# Supplementary material
Source: PubMed Central journal article supplement (PMC4834877)

## **Table of Contents**

|             |                                                             |    |
|-------------|-------------------------------------------------------------|----|
| <b>I.</b>   | Graphical Summary of Prior Syntheses of Cryptocaryol A      |    |
|             | <b>A.</b> Mohapatra                                         | S2 |
|             | <b>B.</b> O'Doherty                                         | S3 |
|             | <b>C.</b> Cossy                                             | S4 |
|             | <b>D.</b> Dias                                              | S5 |
| <b>II.</b>  | General Methods                                             | S6 |
| <b>III.</b> | Procedure, Characterization Data, and Spectra for Compounds | S7 |

A. Mohapatra and coworkers, *Eur. J. Org. Chem.* 2013, 1051.

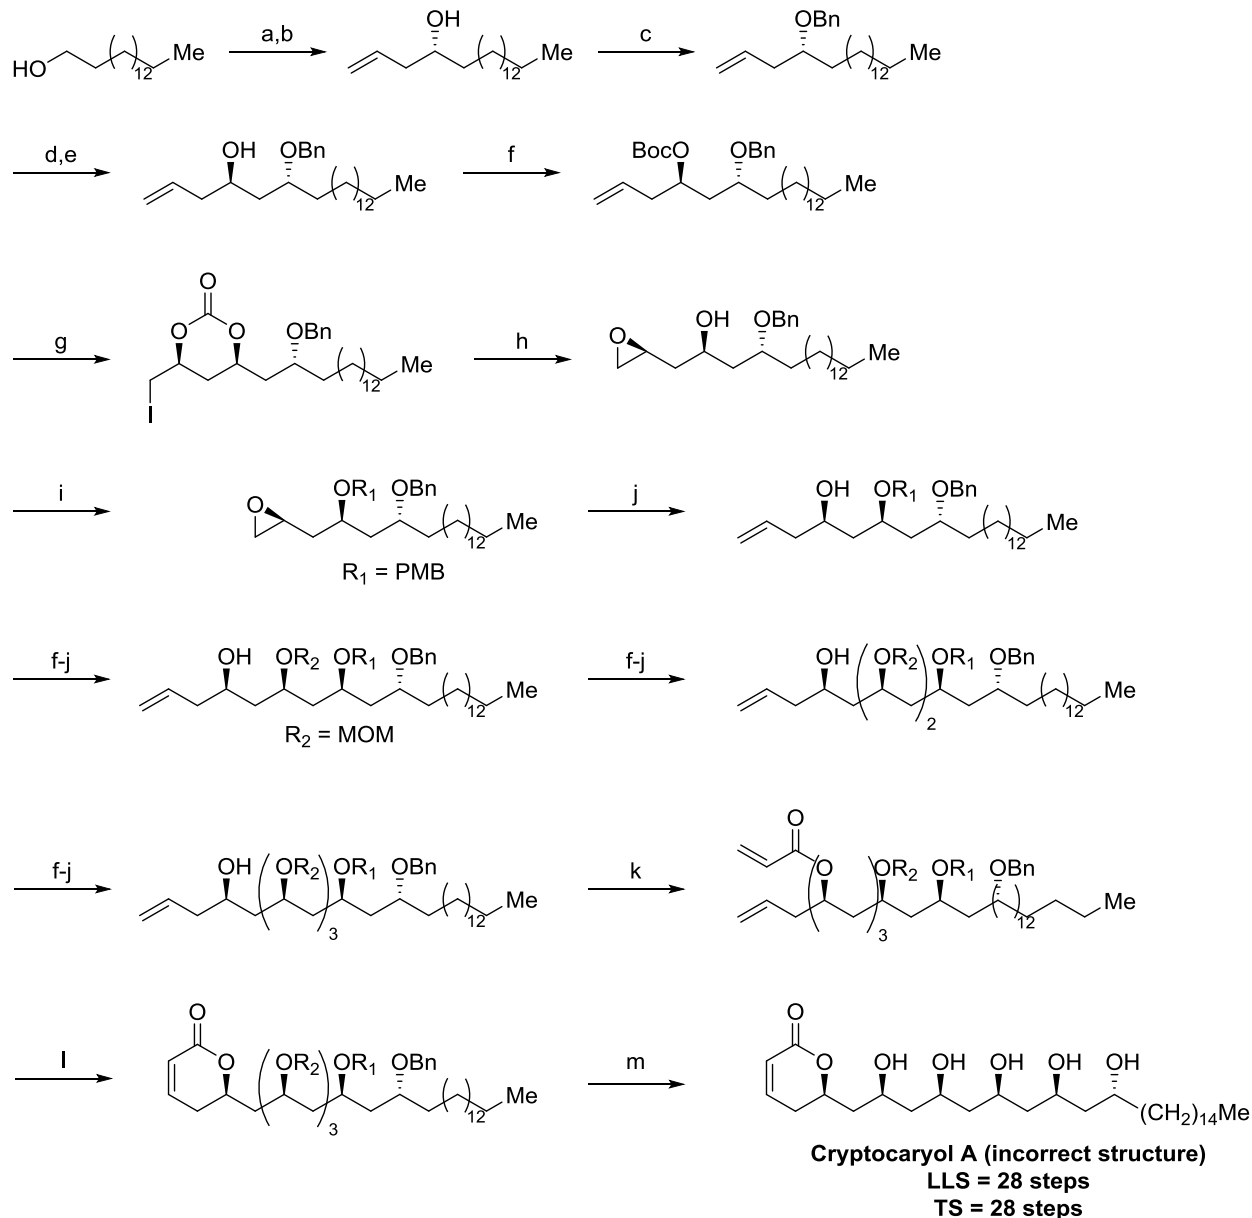

(a) PCC, CH<sub>2</sub>Cl<sub>2</sub>, rt; (b) TiCl<sub>4</sub>, Ti(O*i*Pr)<sub>4</sub>, (*S*)-BINOL, Ag<sub>2</sub>O, allyltributylstannane, -20 °C; (c) NaH, BnBr, THF, 0 °C; (d) OsO<sub>4</sub>, NaIO<sub>4</sub>, 2,6-lutidine, dioxane, rt; (e) allylTMS, TiCl<sub>4</sub>, -78 °C; (f) Boc<sub>2</sub>O, Et<sub>3</sub>N, CH<sub>2</sub>Cl<sub>2</sub>, rt; (g) NIS, CH<sub>3</sub>CN, -40 to 0 °C; (h) K<sub>2</sub>CO<sub>3</sub>, MeOH, rt; (i) first iteration: NaH, PMBCl, THF, DMF, 0 °C (subsequent iterations: NaH, MOMCl, THF, DMF, 0 °C); (j) vinylmagnesium bromide, CuI, THF, -20 °C; (k) acryloyl chloride, DIPEA, CH<sub>2</sub>Cl<sub>2</sub>, 0 °C; (l) Grubbs I, CH<sub>2</sub>Cl<sub>2</sub>, reflux; (m) TiCl<sub>4</sub>, CH<sub>2</sub>Cl<sub>2</sub>, rt.

B. O'Doherty and coworkers, *J. Am. Chem. Soc.* **2013**, *135*, 9334.

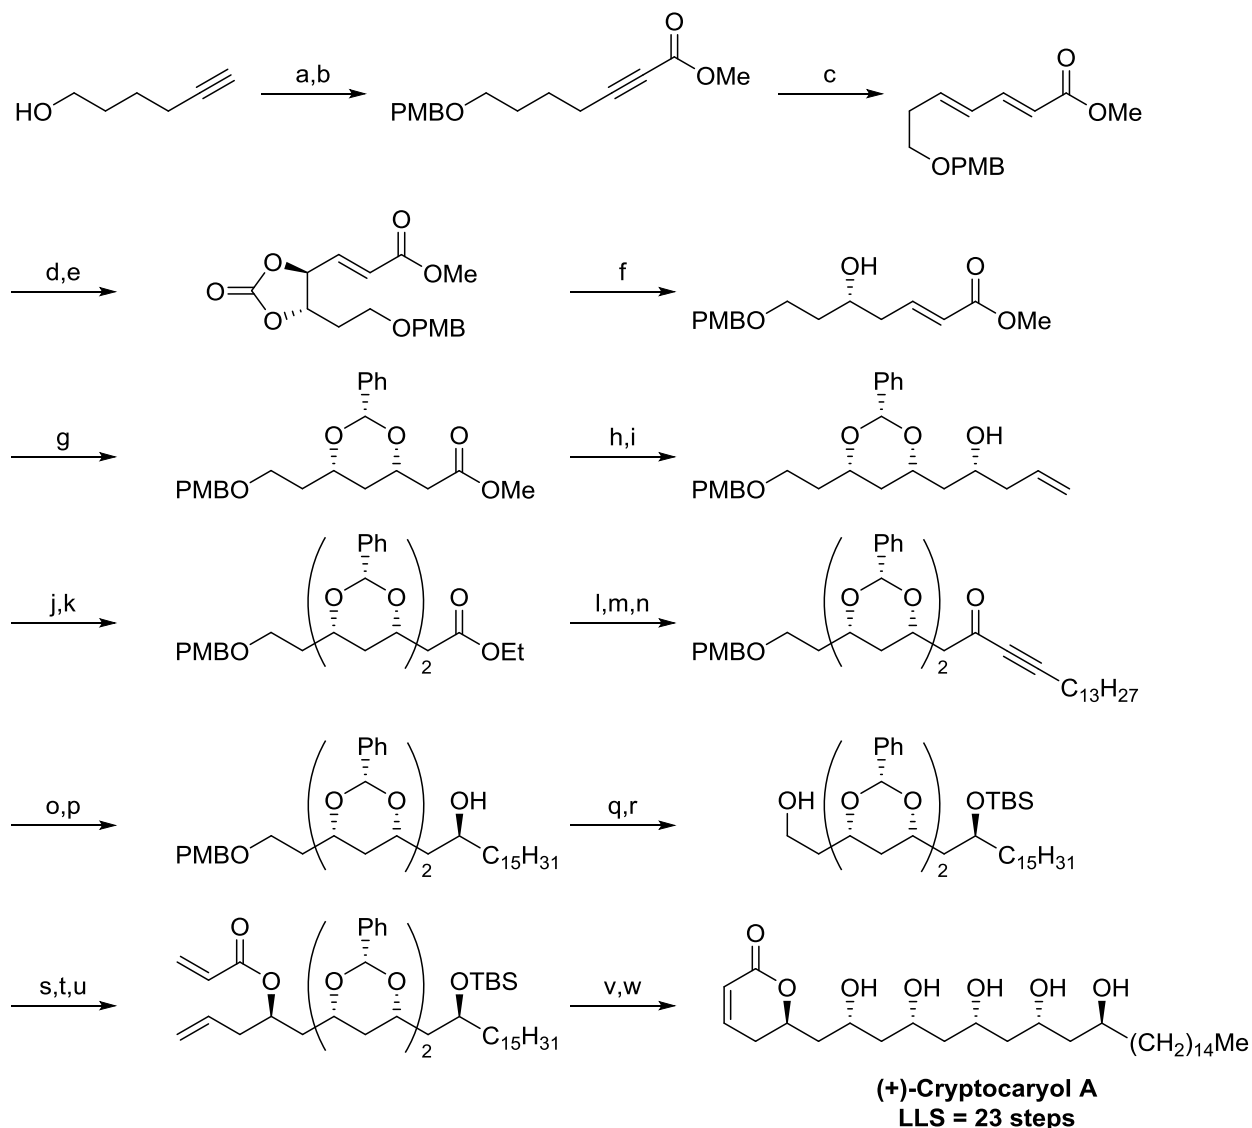

(a) PMBCl, NaH, TFAB, 0 °C; (b)  $\text{ClCO}_2\text{Me}$ , *n*-BuLi, THF, -78 to 0 °C; (c)  $\text{PPh}_3$ , PhOH, benzene, 50 °C; (d) AD-mix- $\alpha$ , *t*-BuOH/ $\text{H}_2\text{O}$ , 0 °C; (e) triphosgene, pyridine, DMAP,  $\text{CH}_2\text{Cl}_2$ , -78 °C; (f)  $\text{PdPPh}_3$ ,  $\text{Et}_3\text{N}$ ,  $\text{HCO}_2\text{H}$ , THF, reflux; (g) PhCHO,  $\text{KO}^t\text{Bu}$ , THF, 0 °C; (h) DIBALH,  $\text{CH}_2\text{Cl}_2$ , -78 °C; (i) (*R,R*)-Leighton,  $\text{Sc}(\text{OTf})_3$ ,  $\text{CH}_2\text{Cl}_2$ , -10 °C, (j) ethyl acetate, Grubbs II,  $\text{CH}_2\text{Cl}_2$ ; (k) PhCHO,  $\text{KO}^t\text{Bu}$ , THF, 0 °C; (l) DIBALH,  $\text{CH}_2\text{Cl}_2$ , -78 °C; (m) 1-pentadecyne, *n*-BuLi, THF, -78 °C; (n) DMP,  $\text{CH}_2\text{Cl}_2$ , 0 °C; (o) (*R,R*)-Noyori,  $\text{Et}_3\text{N}$ ,  $\text{HCO}_2\text{H}$ ; (p) NBSH,  $\text{Et}_3\text{N}$ ,  $\text{CH}_2\text{Cl}_2$ ; (q) TBSCl, imidazole, DMF; (r) DDQ,  $\text{CH}_2\text{Cl}_2$ ,  $\text{H}_2\text{O}$ , 0 °C; (s) DMP,  $\text{CH}_2\text{Cl}_2$ , 0 °C; (t) (*S,S*)-Leighton,  $\text{Sc}(\text{OTf})_3$ ,  $\text{CH}_2\text{Cl}_2$ , -10 °C; (u) acrylic acid, DCC, DMAP,  $\text{CH}_2\text{Cl}_2$ ; (v) Grubbs I,  $\text{CH}_2\text{Cl}_2$ , reflux; (w) AcOH/ $\text{H}_2\text{O}$  = 4:1, 80 °C.

C. Cossy and coworkers, *J. Org. Chem.* **2015**, *80*, 8668.

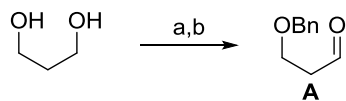

(a) NaH, BnBr, *n*-Bu<sub>4</sub>NI, THF, rt, 7h; (b) PCC, NaOAc, 4 Å MS, CH<sub>2</sub>Cl<sub>2</sub>, rt, 3h.

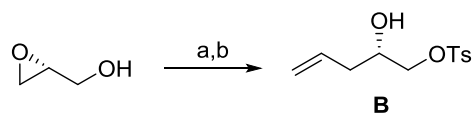

(a) TsCl, Et<sub>3</sub>N, DMAP, CH<sub>2</sub>Cl<sub>2</sub>, 0 °C to rt, 3 h; (b) Li<sub>2</sub>CuCl<sub>4</sub>, vinylmagnesium bromide, THF, -40 °C, 3h.

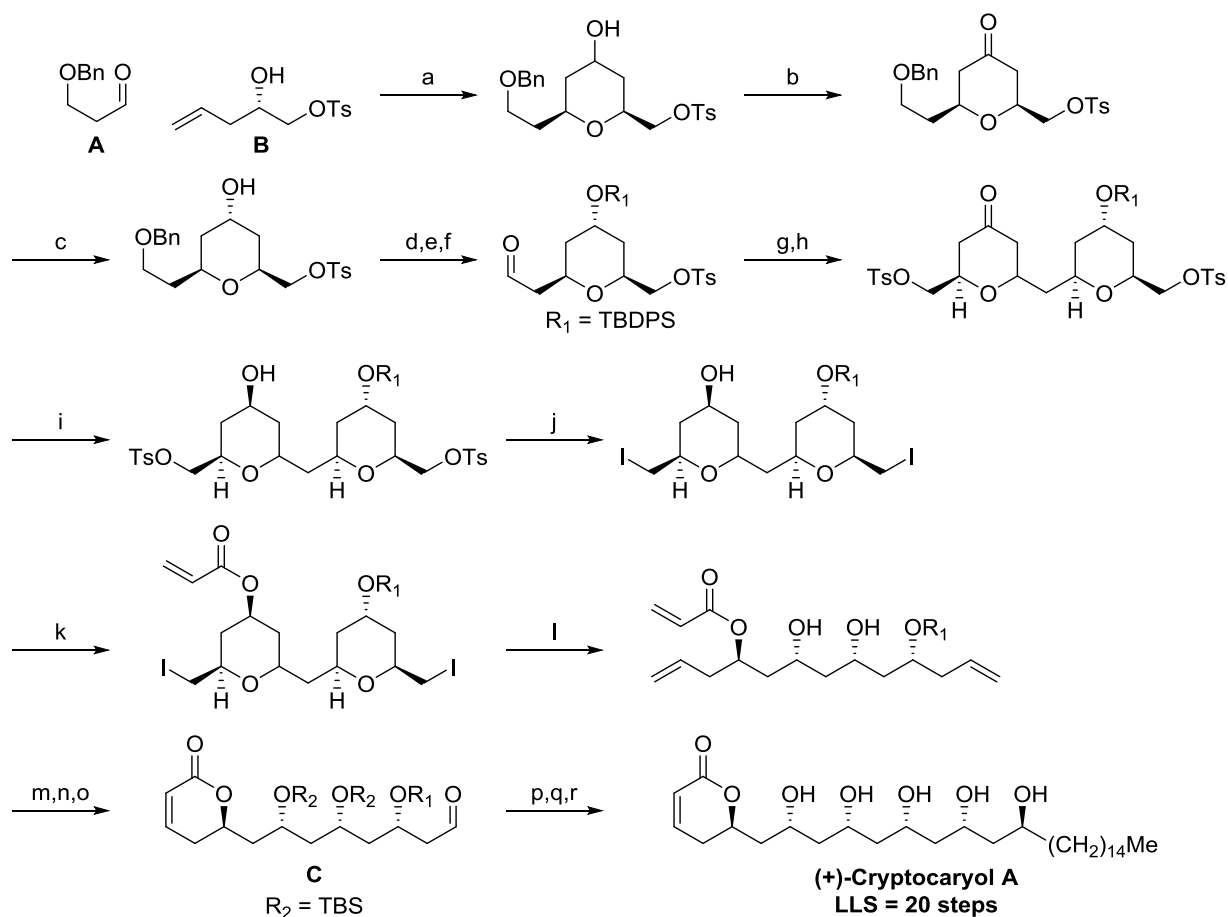

(a) TFA, CH<sub>2</sub>Cl<sub>2</sub>, rt, 3 then NaHCO<sub>3</sub>, Et<sub>3</sub>N; (b) DMP, CH<sub>2</sub>Cl<sub>2</sub>, rt 2.5 h; (c) L-Selectride, THF, -78 °C, 1 h; (d) TBDPSCI, imidazole, CH<sub>2</sub>Cl<sub>2</sub>, rt, 14 h; (e) H<sub>2</sub>, Pd/C, MeOH, EtOAc, rt, 16 h; (f) TPAP, NMO, CH<sub>2</sub>Cl<sub>2</sub>, rt, 2 h; (g) **B**, TFA, CH<sub>2</sub>Cl<sub>2</sub>, rt, 3 h then Et<sub>3</sub>N, NaHCO<sub>3</sub> (aq); (h) DMP, CH<sub>2</sub>Cl<sub>2</sub>, rt, 2h; (i) NaBH<sub>4</sub>, MeOH, -40 °C, 1 h; (j) NaI, acetone,  $\infty$ w, 120 °C, 2 h; (k) acryloyl chloride, *i*Pr<sub>2</sub>NEt, CH<sub>2</sub>Cl<sub>2</sub>, 0 °C to rt, 3.5 h; (l) Zn, THF/H<sub>2</sub>O = 5:1, 70 °C, 1 h; (m) TBSOTf, 2,6-lutidine, CH<sub>2</sub>Cl<sub>2</sub>, -78 °C, 1 h; (n) Grubbs I (10 mol%), CH<sub>2</sub>Cl<sub>2</sub>, 45 °C, 2.5 h; (o) O<sub>3</sub>, CH<sub>2</sub>Cl<sub>2</sub>, -78 °C then PPh<sub>3</sub>; (p) (1) heptadecan-2-one, Cy<sub>2</sub>BCl, Et<sub>3</sub>N, pentane, 0 °C, 2 h (2) **C**, pentane, -78 °C to 40 °C, 4 h (3) MeOH/pH7 buffer/H<sub>2</sub>O<sub>2</sub>, -40 °C to rt, 16 h; (q) Me<sub>4</sub>NBH(OAc)<sub>3</sub>, CH<sub>3</sub>CN/MeOH = 1:1, -20 °C, 7 h; (r) HF•CH<sub>3</sub>CN, rt, 2.5 h.

D. Dias and coworkers, *Org. Biomol. Chem.* **2015**, *13*, 3575.

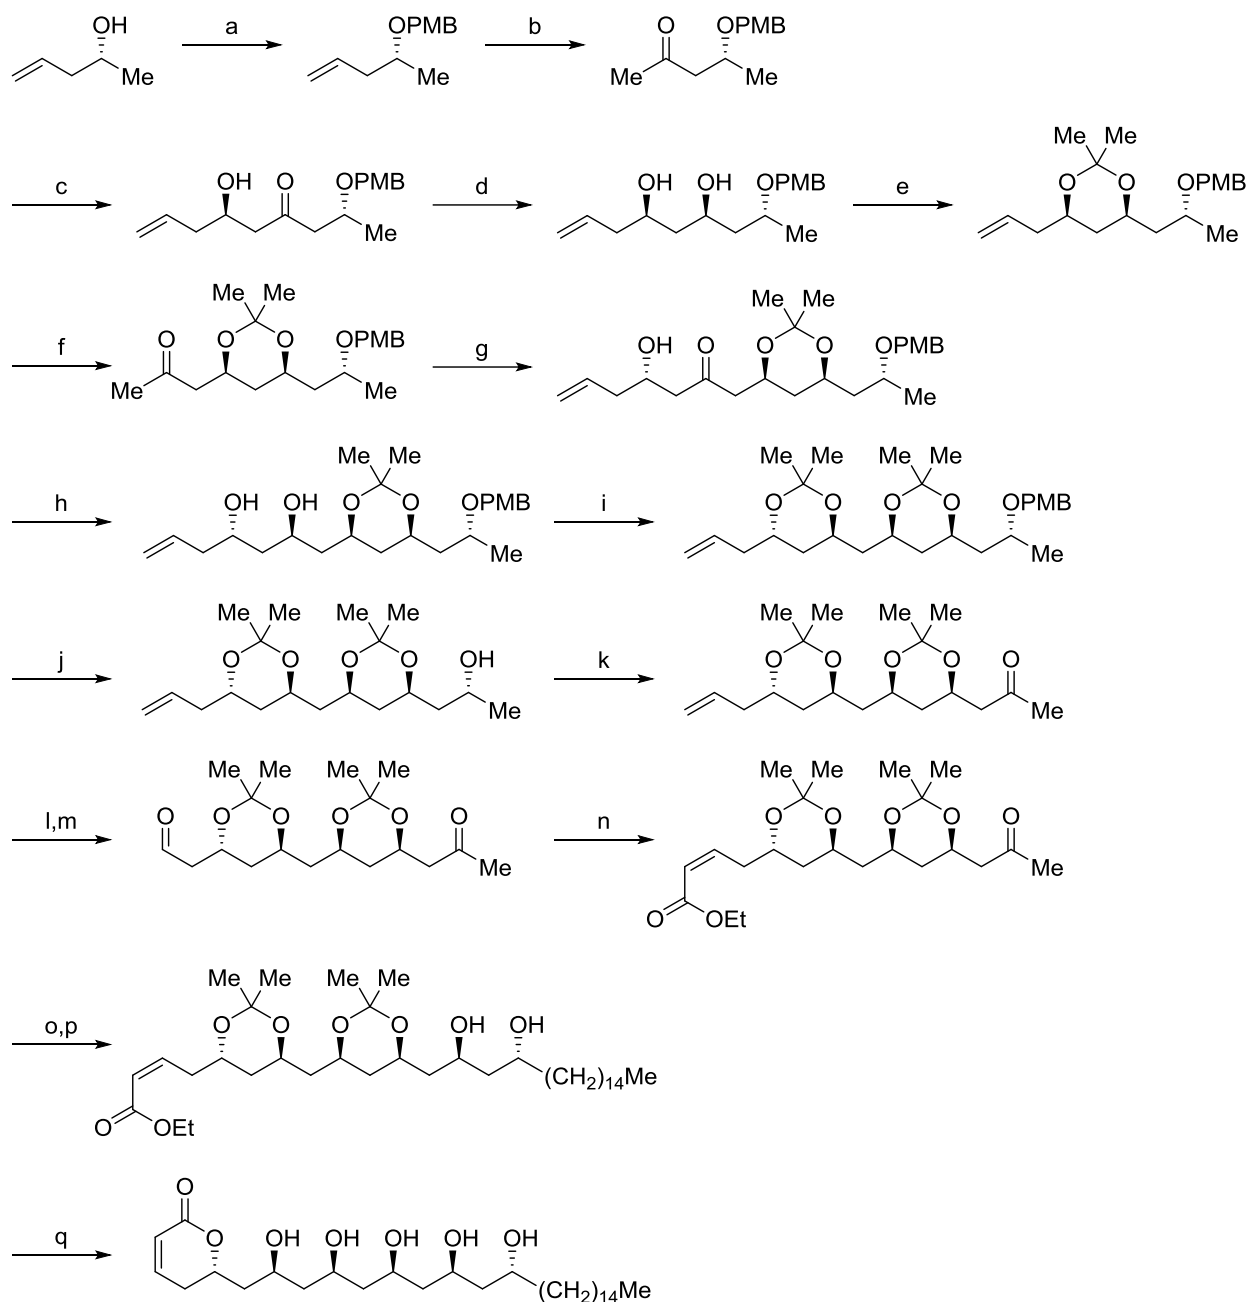

**(-)-Cryptocaryol A**  
**LLS = 17 steps**  
**TS = 17 steps**

(a) PMB trichloroacetimidate, CSA, CH<sub>2</sub>Cl<sub>2</sub>, rt; (b) PdCl<sub>2</sub>, CuCl, O<sub>2</sub>, DMF, H<sub>2</sub>O, rt; (c) (1) Cy<sub>2</sub>BCl, Et<sub>3</sub>N, Et<sub>2</sub>O, -30 °C (2) 3-butenal, -78 °C; (d) LiBH<sub>4</sub>, Et<sub>2</sub>BOMe, THF, MeOH, -78 °C; (e) 2,2-DMP, CSA, rt; (f) PdCl<sub>2</sub>, CuCl, O<sub>2</sub>, DMF, H<sub>2</sub>O, rt; (g) (1) Cy<sub>2</sub>BCl, Et<sub>3</sub>N, Et<sub>2</sub>O, -30 °C (2) 3-butenal, -78 °C; (h) Me<sub>4</sub>NHB(OAc)<sub>3</sub>, MeCN, AcOH, -30 to -20 °C; (i) 2,2-DMP, PPTS, rt; (j) DDQ, CH<sub>2</sub>Cl<sub>2</sub>, buffer, 0 °C; (k) (COCl)<sub>2</sub>, DMSO, Et<sub>3</sub>N, CH<sub>2</sub>Cl<sub>2</sub>, -78 °C; (l) OsO<sub>4</sub>, NMO, *t*-BuOH, THF, H<sub>2</sub>O, rt; (m) NaIO<sub>4</sub>, THF, H<sub>2</sub>O; (n) ethyl 2-bis(*o*-tolylxy)phosphorylacetate, NaH, THF, -78 °C; (o) (1) Cy<sub>2</sub>BCl, Et<sub>3</sub>N, Et<sub>2</sub>O, -30 °C (2) palmitaldehyde, CH<sub>2</sub>Cl<sub>2</sub>, -78 °C; (p) Me<sub>4</sub>NHB(OAc)<sub>3</sub>, MeCN, AcOH, -30 to -20 °C; (q) CSA, MeOH.

## **II. General Methods**

All reactions were run under an atmosphere of argon under anhydrous conditions unless otherwise indicated. Dichloroethane (DCE), triethylamine (Et<sub>3</sub>N), Hünig's Base (*i*Pr<sub>2</sub>EtN) and dichloromethane (CH<sub>2</sub>Cl<sub>2</sub>) were distilled over CaH<sub>2</sub>. Diethyl ether (Et<sub>2</sub>O), tetrahydrofuran (THF), and toluene (PhMe) were distilled over sodium. Pressure tubes (25x150 mm, PYREXPLUS, and 350 mL flask, purchased from Chem Glass) were dried in an oven overnight and cooled under a stream of nitrogen prior to use. Commercially available allyl acetate (Aldrich) was purified by distillation prior to use. Acrolein was purified by distillation prior to use. All other commercial reagents were used directly without further purification unless specified. All analytical thin-layer chromatography (TLC) was carried out using 0.2 mm commercial silica gel plates (DC-Fertigplatten Kieselgel 60 F<sub>254</sub>). Plates were visualized by treatment with UV, acidic *p*-anisaldehyde stain, ceric ammonium molybdate stain, or KMnO<sub>4</sub> stain with gentle heating. Infrared spectra were recorded on a Nicolet 380 FTIR. High-resolution mass spectra (HRMS) were obtained on a Karatos MS9 and are reported as *m/z* (relative intensity). Accurate masses are reported for the molecular ion ([M+H]<sup>+</sup>, [M-H]<sup>+</sup>, or [M+Na]<sup>+</sup>). Nuclear magnetic resonance spectra (<sup>1</sup>H NMR and <sup>13</sup>C NMR) were recorded with a Varian Gemini (400 MHz or 600 MHz) spectrometer for CDCl<sub>3</sub> and (CD<sub>3</sub>)<sub>2</sub>O solutions and chemical shifts are reported as parts per million (ppm) relative to residual CHCl<sub>3</sub> δ<sub>H</sub> (7.26 ppm), CDCl<sub>3</sub> δ<sub>C</sub> (77.0 ppm), CD<sub>3</sub>OD δ<sub>H</sub> (4.87 ppm), CD<sub>3</sub>OD δ<sub>C</sub> (49.0 ppm) respectively, as internal standards. Coupling constants are reported in hertz (Hz). Optical rotations were measured on an ATAGO AP-300 automatic polarimeter at a path length of 100 mm.

### III. Procedure, Characterization Data, and Spectra for Compounds

#### **(4*R*,6*R*)-nona-1,8-diene-4,6-diol (1)**

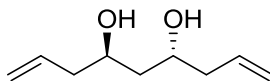

To an oven-dried sealed tube under one atmosphere of argon gas charged with [Ir(cod)Cl]<sub>2</sub> (0.672 g, 1.00 mmol, 5 mol%), (*R*)-BINAP (1.25 g, 2.00 mmol, 10 mol%), Cs<sub>2</sub>CO<sub>3</sub> (2.61 g, 8.00 mmol, 40 mol%) and 4-chloro-3-nitrobenzoic acid (0.806 g, 4.00 mmol, 20 mol%) was added THF (50 mL) followed by allyl acetate (20.0 g, 200 mmol, 1000 mol%). The reaction mixture was stirred at 90 °C for 0.5 h before cooling to ambient temperature. 1,3-propanediol (1.52 g, 20.0 mmol, 100 mol%) in THF (50 mL, 0.2 M overall) was added and the reaction mixture was stirred at 100 °C for 5 days. The reaction mixture was cooled to ambient temperature, filtered through Celite, and excess solvent was removed under reduced pressure. The crude material was dissolved in EtOAc (50 mL) and vigorously stirred. Et<sub>2</sub>O (100 mL) was added slowly followed by hexanes (100 mL). The precipitate was filtered through Celite and the solution was concentrated onto silica gel. Column chromatography (SiO<sub>2</sub>, EtOAc:hexanes, 1:6 to 1:4 with 0.1% TEA) furnished the title compound (1.68 g, 10.8 mmol, dr = 20:1, ee > 99%) in 54% yield as a pale yellow oil.

**TLC (SiO<sub>2</sub>)**: R<sub>f</sub> = 0.25 (EtOAc:hexanes, 1:4).

**<sup>1</sup>H NMR**: (400 MHz, CDCl<sub>3</sub>): δ 5.87-5.77 (m, 2H), 5.17-5.15 (m, 2H), 5.13-5.12 (m, 2H), 4.04-3.97 (m, 2H), 2.39 (d, *J* = 3.5 Hz, 2H), 2.30-2.24 (m, 4H), 1.66-1.63 (m, 2H).

**<sup>13</sup>C NMR**: (100 MHz, CDCl<sub>3</sub>): δ 134.8, 118.4, 68.23, 42.17, 41.63.

**FTIR (neat)**: ν 3333, 2936, 2359, 2342, 1214, 1434, 1325, 1133, 1047.cm<sup>-1</sup>.

**HRMS**: (ESI) Calcd. for C<sub>9</sub>H<sub>16</sub>O<sub>2</sub>Na (M+Na)<sup>+</sup>: 179.1048, Found: 179.1042.

**HPLC**: The enantiomeric excess was determined by chiral HPLC as described by Krische and coworkers.<sup>1</sup>

---

<sup>1</sup> Lu, Y.; Kim, I. S.; Hassan, A.; Del Valle, D. J.; Krische, M. J. *Angew. Chem. Int. Ed.* **2009**, *48*, 5018.

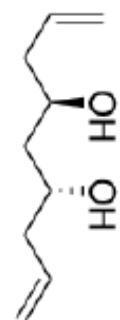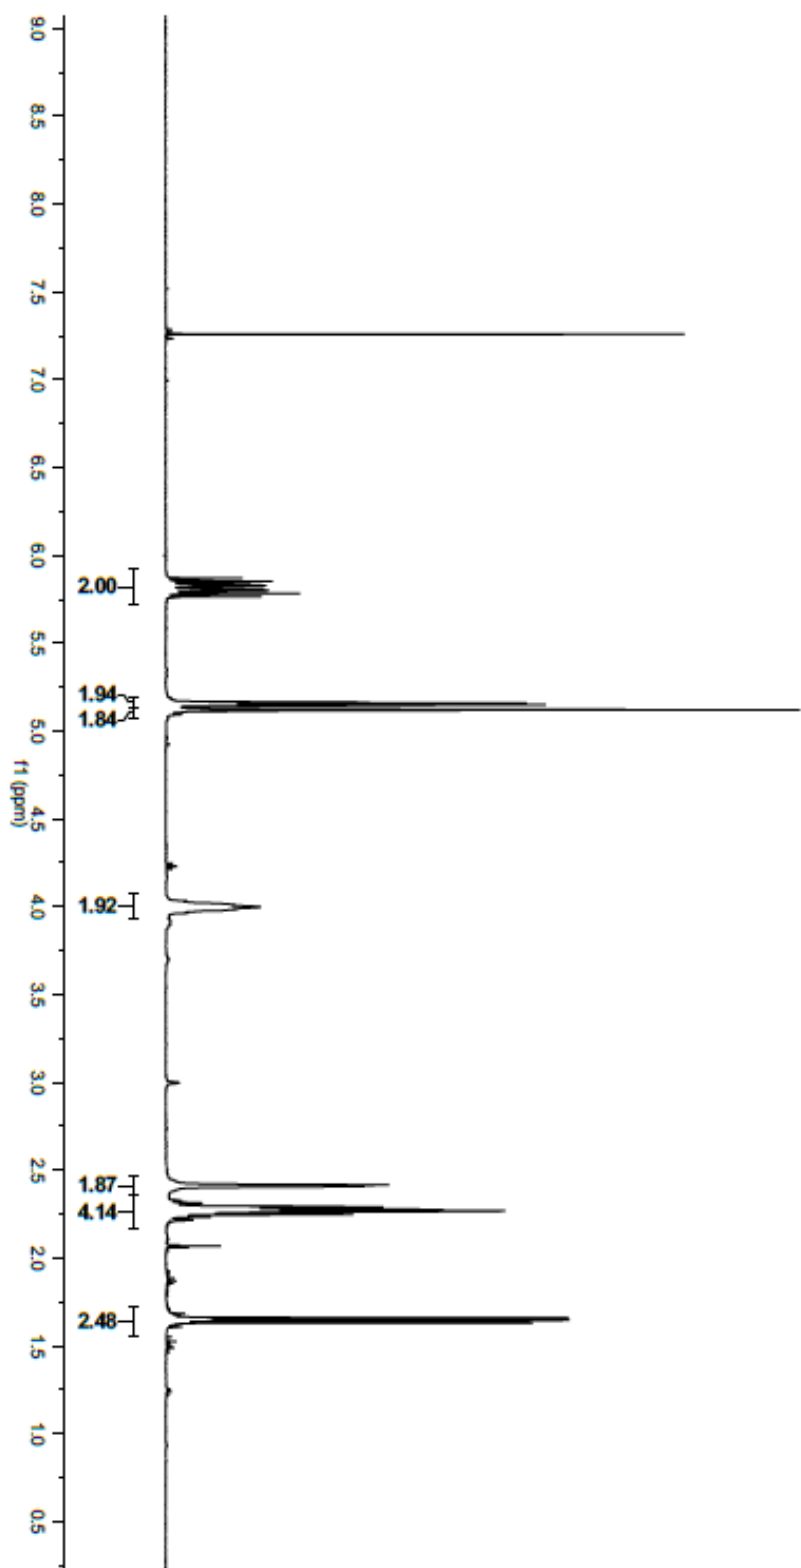



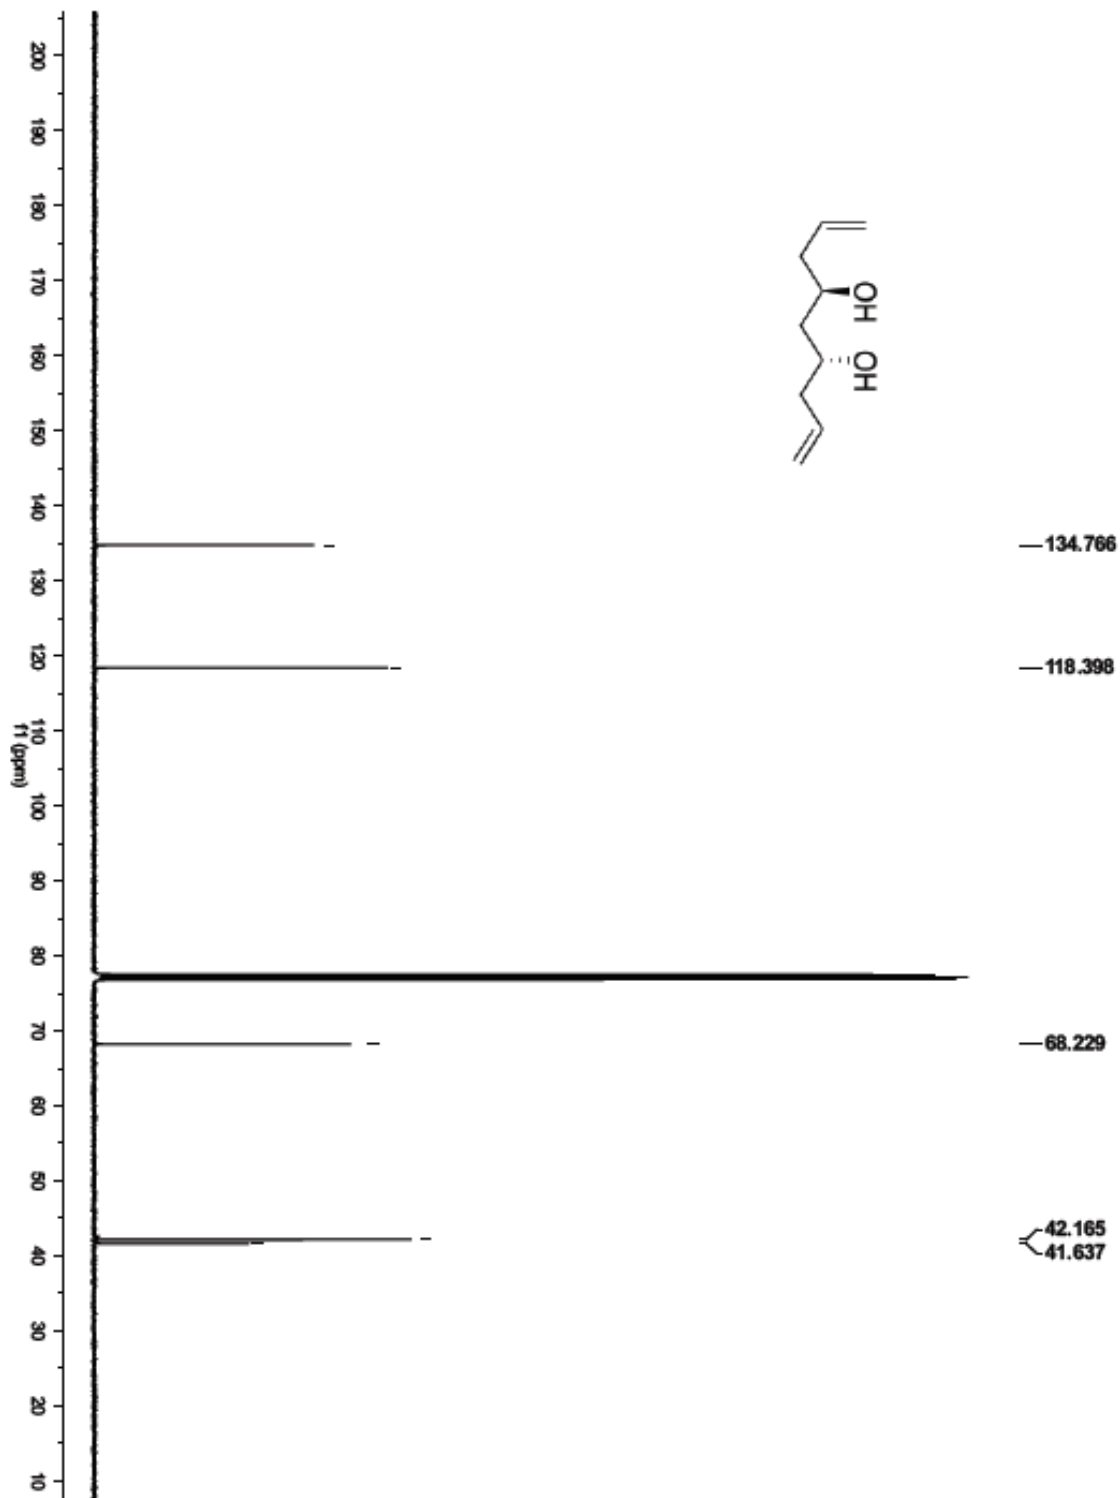

**(4*R*,6*R*)-6-hydroxynona-1,8-dien-4-yl acrylate (2)**

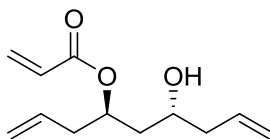

To a stirred solution of diol **1** (104.1 mg, 0.666 mmol, 100 mol%) in dry MeCN (3.30 mL, 0.2 M) was added  $i$ Pr<sub>2</sub>NEt (230  $\mu$ L, 1.33 mmol, 200 mol%) followed by 2-aminoethyl diphenylborinate (14.9 mg, 0.07 mmol, 10 mol%). Acryloyl chloride (90.5 mg, 1.00 mmol, 150 mol%) was added dropwise and the solution was stirred at ambient temperature for 3 h. The reaction mixture was poured into H<sub>2</sub>O and EtOAc and extracted with EtOAc (3 x 10 mL). The combined organic extracts were washed with brine, dried (MgSO<sub>4</sub>), filtered through Celite and concentrated by rotary evaporation. The crude material was subjected to flash column chromatography (SiO<sub>2</sub>, EtOAc:hexanes 1:9) to afford the title compound (136.4 mg, 0.646 mmol) as a colorless oil in 97% yield.

**TLC (SiO<sub>2</sub>):** R<sub>f</sub> = 0.21 (1:9 EtOAc:hexanes)

**<sup>1</sup>H NMR:** (400 MHz, CDCl<sub>3</sub>):  $\delta$  = 6.43 (dd,  $J$  = 17.3, 1.4 Hz, 1H), 6.13 (dd,  $J$  = 17.3, 10.4 Hz, 1H), 5.87 (dd,  $J$  = 10.4, 1.4 Hz, 1H), 5.84-5.71 (m, 2H), 5.27-5.21 (m, 1H), 5.13-5.06 (m, 4H), 3.61-3.54 (m, 1H), 2.83 (d,  $J$  = 3.8 Hz, 1H), 2.41-2.37 (m, 2H), 2.25-2.21 (m, 2H), 1.74-1.60 (m, 2H).

**<sup>13</sup>C NMR:** (100 MHz, CDCl<sub>3</sub>):  $\delta$  = 166.9, 134.7, 133.3, 131.4, 128.2, 118.0, 117.6, 70.94, 66.52, 41.59, 41.57, 39.24.

**FTIR (neat):**  $\nu$  3464, 3016, 2970, 1739, 1407, 1366, 1297, 1228, 1217, 1206, 1049 cm<sup>-1</sup>.

**HRMS:** (ESI) Calcd. for C<sub>12</sub>H<sub>18</sub>O<sub>3</sub>Na (M+Na)<sup>+</sup>: 233.1154, Found: 233.1147

**$[\alpha]_D^{23}$ :** - 28.94° (c = 0.36, CHCl<sub>3</sub>).

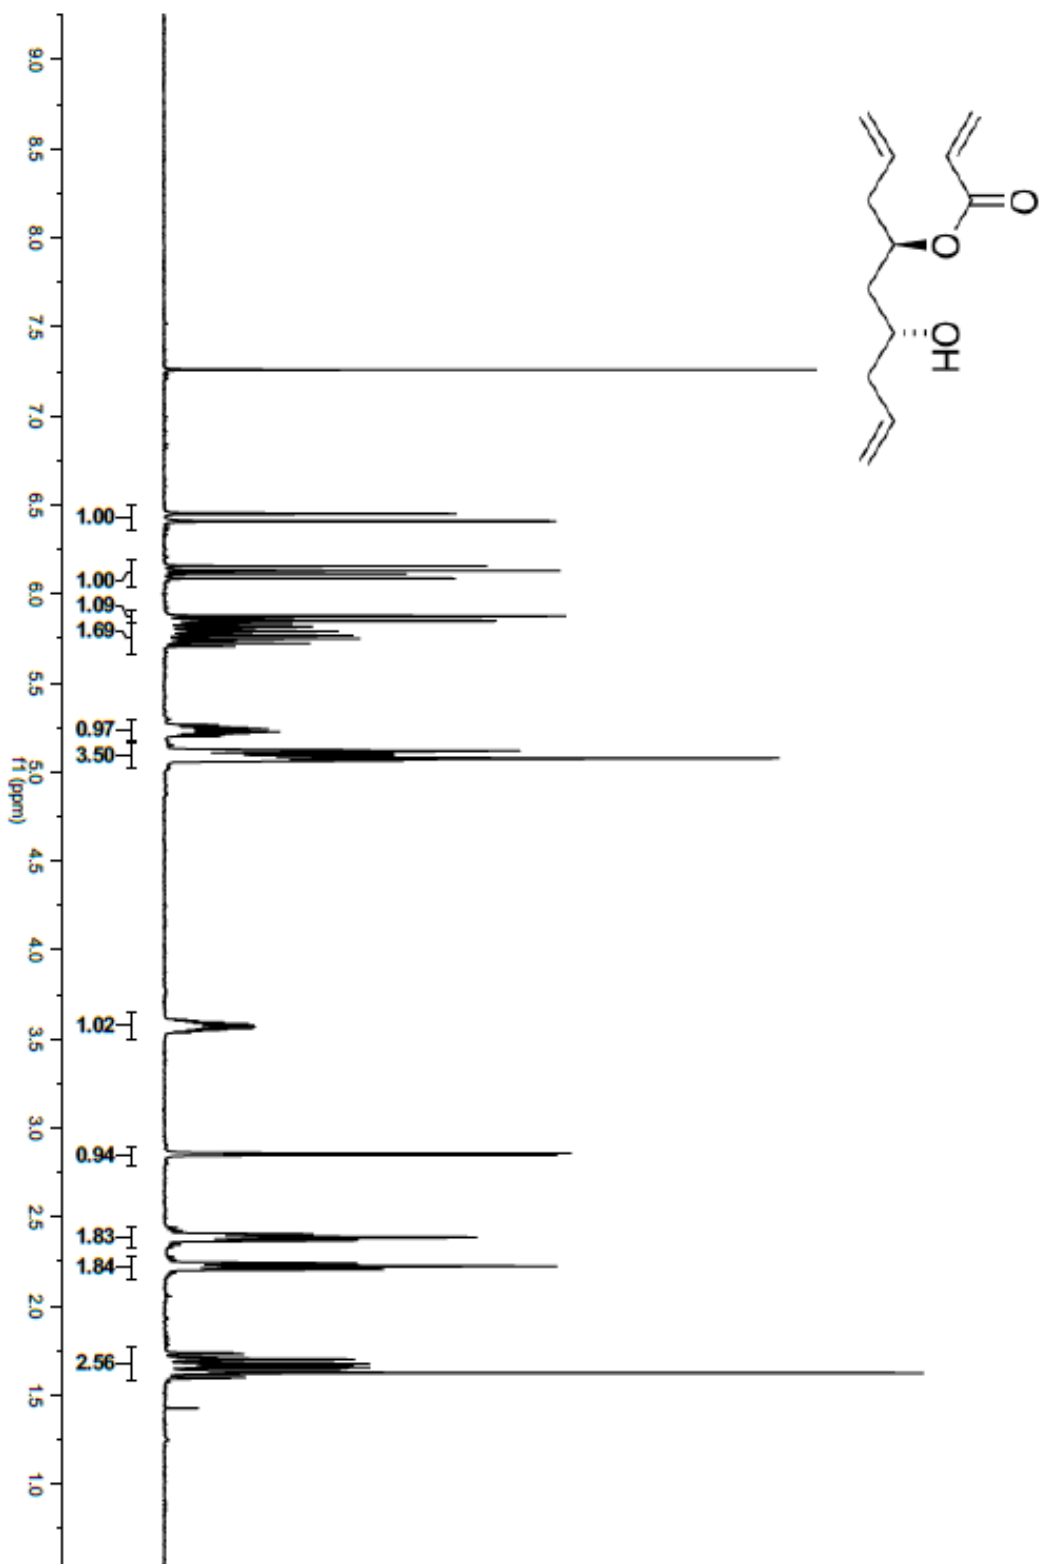

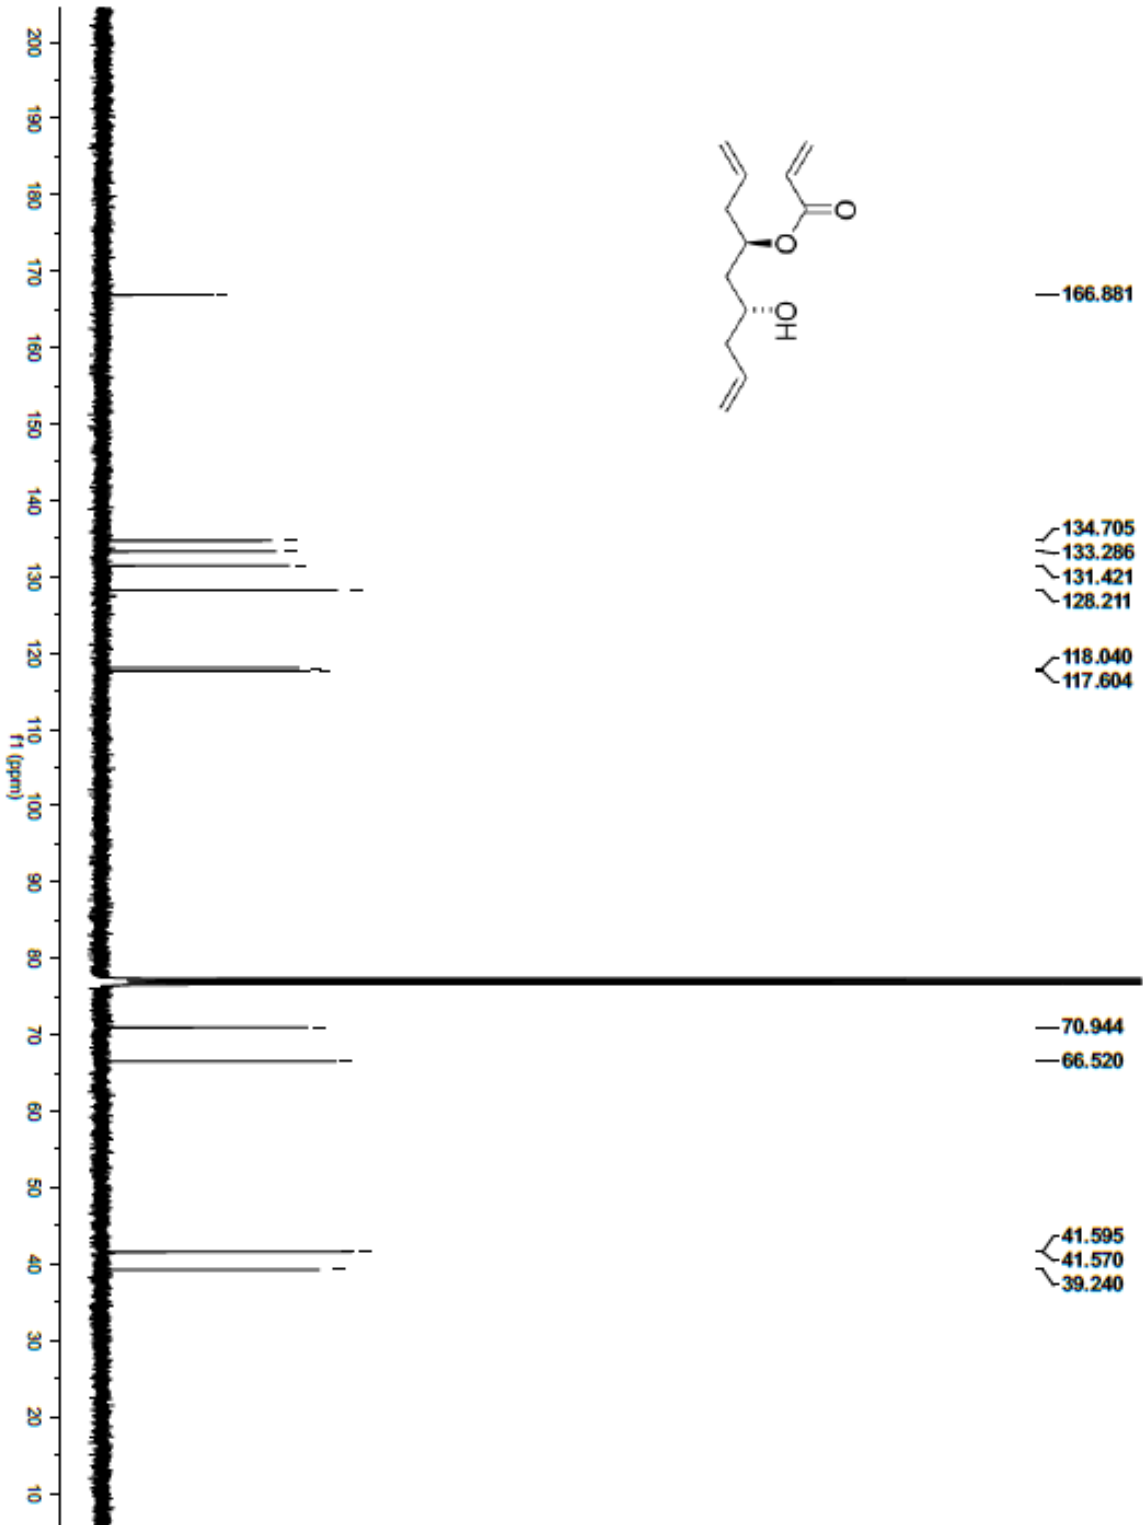

**(4*R*,6*R*)-6-((triethylsilyl)oxy)nona-1,8-dien-4-yl acrylate (3)**

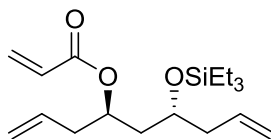

To a stirred solution of acrylate **2** (136.4 mg, 0.65 mmol, 100 mol%) in dry CH<sub>2</sub>Cl<sub>2</sub> (13.0 mL, 0.05 M) was added 2,6-lutidine (150 μL, 1.30 mmol, 200 mol%). The reaction cooled to -78 °C. TESOTf (220 μL, 0.97 mmol, 150 mol%) was added dropwise and the solution was stirred at -78 °C for 1.5 h. The reaction was quenched with saturated NH<sub>4</sub>Cl and warmed to ambient temperature. The reaction mixture was poured into separatory funnel containing water and was extracted with CH<sub>2</sub>Cl<sub>2</sub> (3 x 15 mL). The combined organic extracts were washed with brine, dried (MgSO<sub>4</sub>), filtered through Celite and concentrated by rotary evaporation. The crude material was subjected to flash column chromatography (SiO<sub>2</sub>, EtOAc:hexanes 1:32) to furnish the title compound (198.4 mg, 0.61 mmol) as a colorless oil in 94% yield.

**TLC (SiO<sub>2</sub>):** R<sub>f</sub> = 0.42 (1:19 ethyl acetate:hexanes)

**<sup>1</sup>H NMR:** (400 MHz, CDCl<sub>3</sub>): δ = 6.38 (dd, *J* = 17.3, 1.5 Hz, 1H), 6.10 (dd, *J* = 17.3, 10.4 Hz, 1H), 5.84-5.70 (m, 2H), 5.80 (dd, *J* = 10.4, 1.5 Hz, 1H), 5.09-5.03 (m, 5H), 3.84-3.78 (m, 1H), 2.40-2.36 (m, 2H), 2.26-2.22 (m, 2H), 1.76 (ddd, *J* = 14.5, 9.5, 3.2 Hz, 1H), 1.62 (ddd, *J* = 14.5, 9.0, 3.2 Hz, 1H), 0.94 (t, *J* = 7.9 Hz, 9H), 0.57 (q, *J* = 8.0 Hz, 6H).

**<sup>13</sup>C NMR:** (100 MHz, CDCl<sub>3</sub>): δ = 165.8, 134.6, 133.5, 130.5, 129.0, 118.0, 117.5, 71.3, 68.7, 42.9, 40.7, 39.3, 7.1, 5.2.

**FTIR (neat):** ν 3016, 2970, 1739, 1405, 1366, 1229, 1217, 1205, 1092 cm<sup>-1</sup>.

**HRMS:** (ESI) Calcd. for C<sub>18</sub>H<sub>32</sub>O<sub>3</sub>SiNa (M+Na)<sup>+</sup>: 347.2018, Found: 347.2015

**[α]<sub>D</sub><sup>23</sup>:** -30.87 ° (c = 0.65, CHCl<sub>3</sub>).

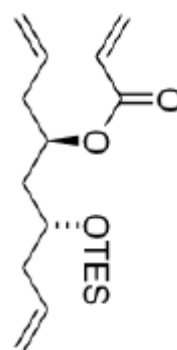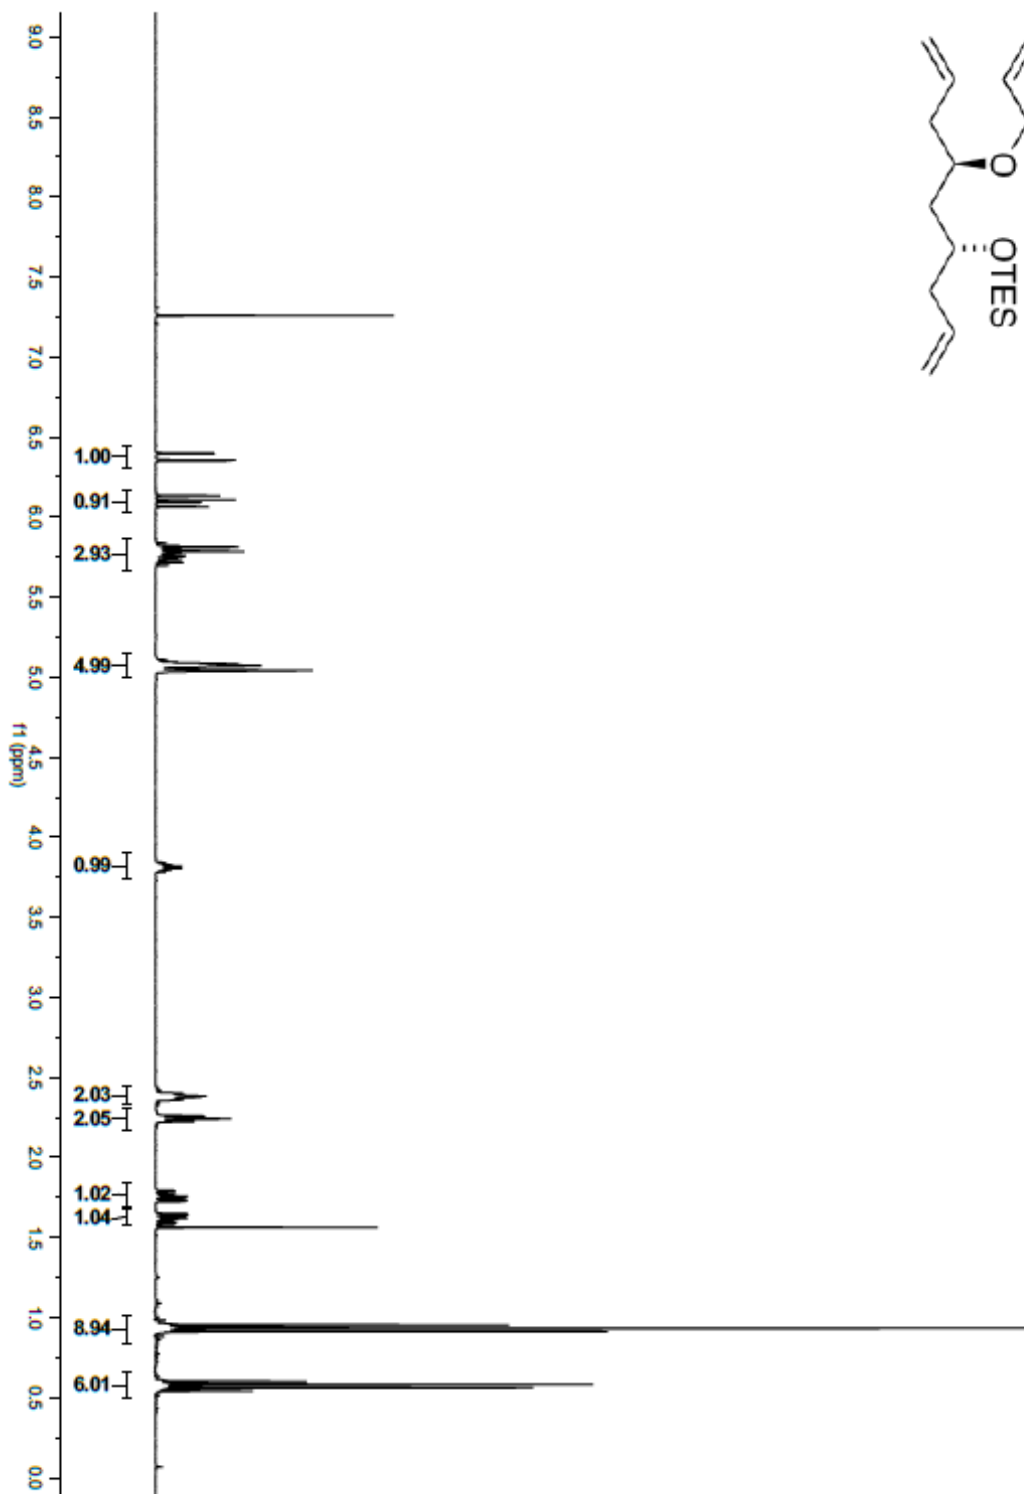

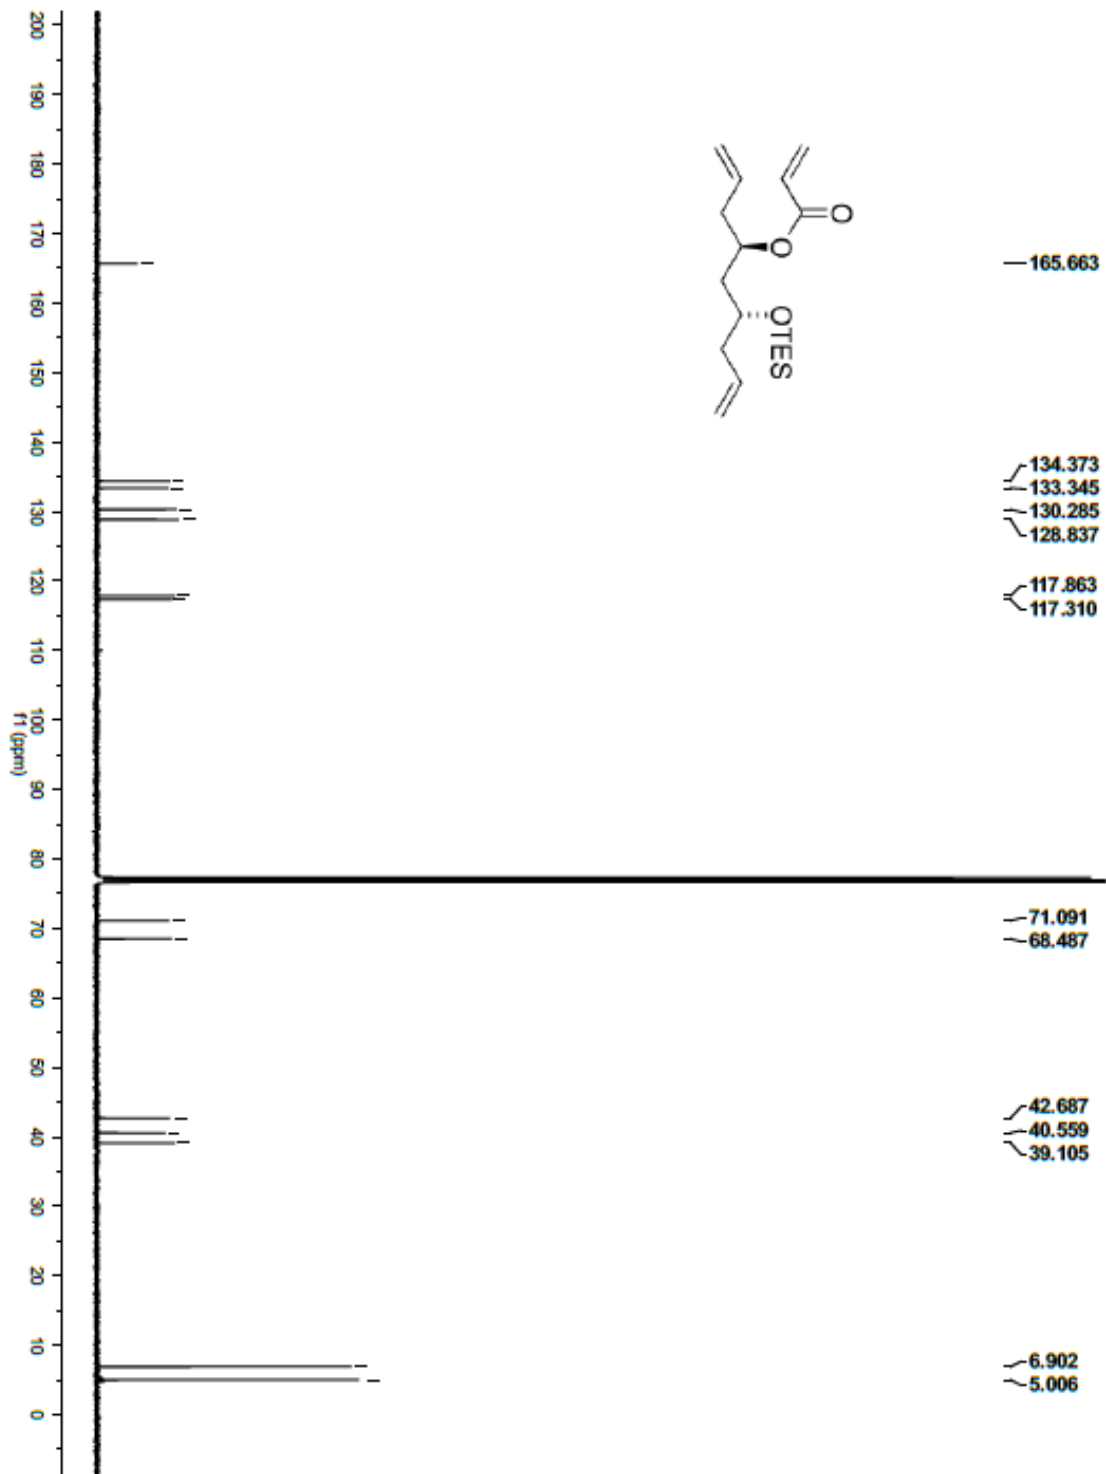

**(R,E)-6-((R)-6-oxo-3,6-dihydro-2H-pyran-2-yl)-5-((triethylsilyl)oxy)hex-2-enal (4)**

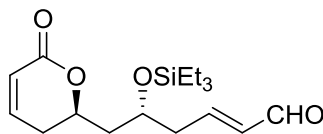

A 100 mL round bottom flask equipped with a reflux condenser was charged with the Hoveyda-Grubbs II catalyst (62.7 mg, 0.10 mmol, 10 mol%). The flask was purged with argon, sealed with a septum and octafluorotoluene (10 mL) was injected *via* syringe. The solvent was sparged with argon. A solution of **3** (325.5 mg, 1.0 mmol, 100 mol%) and freshly distilled acrolein (100 mg, 1.8 mmol, 180 mol%) in octafluorotoluene (10 mL, 0.05 M overall) was delivered via syringe. The reaction mixture was sparged with argon for an additional 5 minutes. The solution was stirred at room temperature for 10 minutes and gradually heated to 120 °C over 30 minutes. Stirring at 120 °C was continued for 2 h and the mixture was cooled to room temperature. The mixture was concentrated *in vacuo* and the dark oil was subjected to flash column chromatography (SiO<sub>2</sub>, EtOAc:hexanes 1:4 to 3:7) to furnish the title compound as an orange oil (269.1 mg, 0.82 mmol) in 82% yield.

**TLC (SiO<sub>2</sub>):** 0.29 (3:7 EtOAc:hexanes).

**<sup>1</sup>H NMR:** (400 MHz, CDCl<sub>3</sub>): δ = 9.52 (d, *J*=7.9, 1H), 6.94 – 6.79 (m, 2H), 6.16 (ddt, *J*=15.7, 7.9, 1.3, 1H), 6.03 (dt, *J*=9.8, 1.8, 1H), 4.66 – 4.52 (m, 1H), 4.37 – 4.25 (m, 1H), 2.60 (ddd, *J*=14.4, 6.7, 1.4, 1H), 2.56 – 2.46 (m, 1H), 2.35 – 2.27 (m, 2H), 1.82 (ddd, *J*=14.3, 10.3, 2.4, 1H), 1.63 (ddd, *J*=14.3, 10.1, 2.2, 1H), 0.95 (t, *J*=7.9, 9H), 0.63 (q, *J*=7.8, 6H).

**<sup>13</sup>C NMR:** (100 MHz, CDCl<sub>3</sub>): δ = 193.8, 164.1, 153.5, 145.3, 135.6, 121.5, 74.3, 66.3, 42.4, 41.5, 30.0, 7.0, 5.0.

**FTIR (neat):** 2954, 2876, 1720, 1689, 1381, 1246 cm<sup>-1</sup>

**HRMS:** (ESI) Calcd. for C<sub>17</sub>H<sub>28</sub>O<sub>4</sub>SiNa (M+Na)<sup>+</sup>: 347.16490, Found: 347.16530.

**[α]<sub>D</sub><sup>22</sup>:** -11.42 ° (c = 1.08, CHCl<sub>3</sub>).



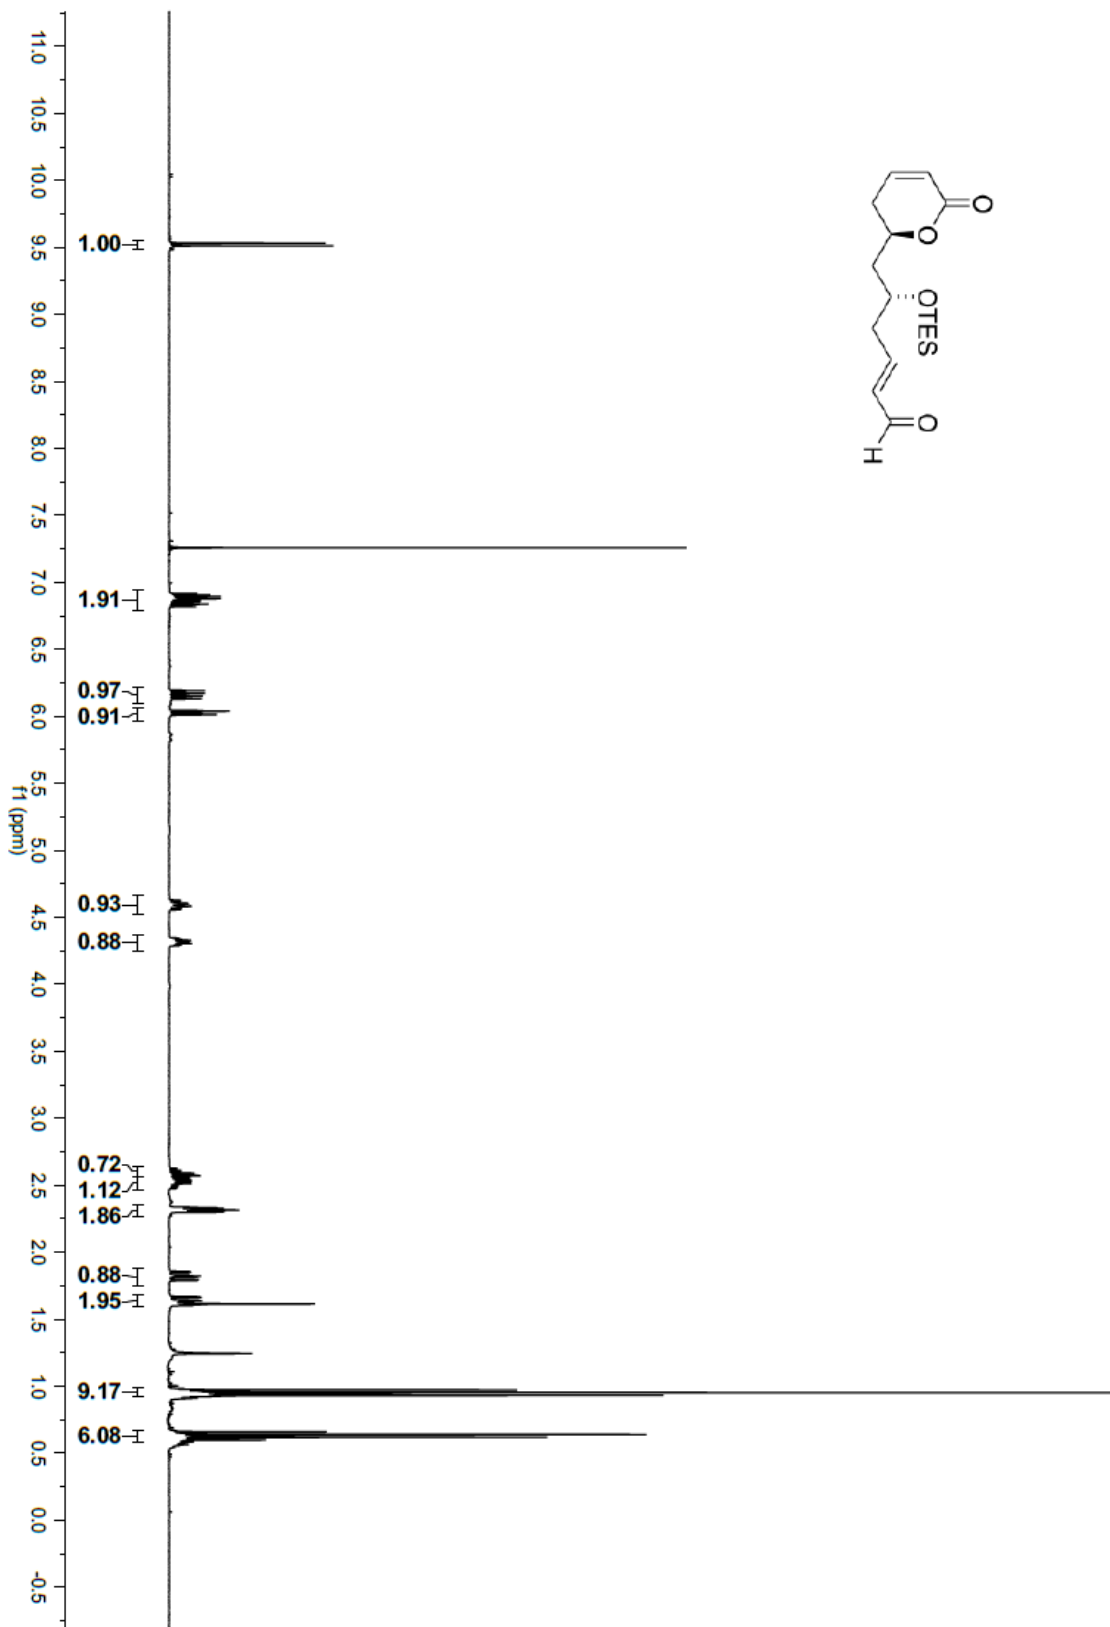

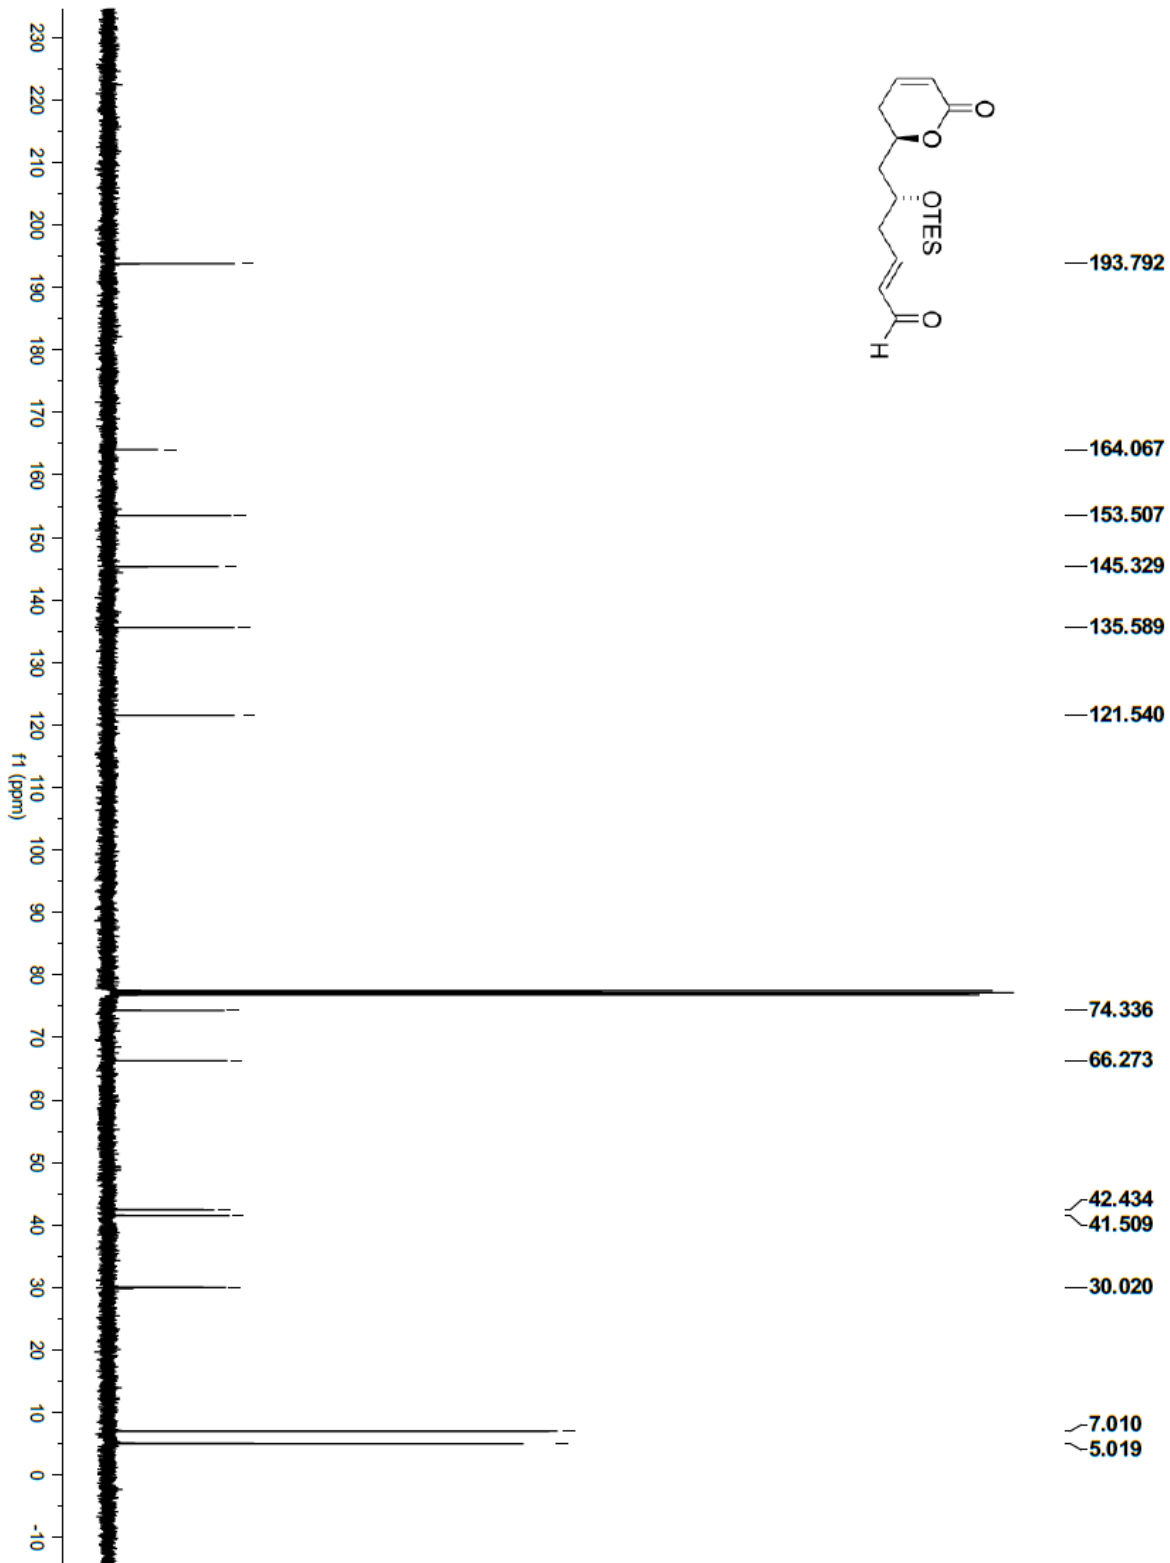

**2-((4S,6R)-2-methyl-6-(((R)-6-oxo-3,6-dihydro-2H-pyran-2-yl)methyl)-1,3-dioxan-4-yl)acetaldehyde (Fragment A)**

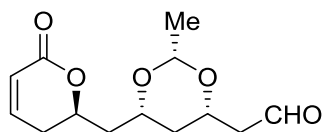

A 10 mL screw cap tube was charged with  $\text{Bi}(\text{NO}_3)_3 \cdot 5\text{H}_2\text{O}$  (14.9 mg, 0.031 mmol, 10 mol%). A solution of **4** (100 mg, 0.308 mmol, 100 mol%) and acetaldehyde (271.3 mg, 6.16 mmol, 2000 mol%) in dichloromethane (3.1 mL, 0.1 M) was added *via* syringe. The mixture was stirred for three days at room temperature. The cloudy mixture was filtered through Celite with the aid of chloroform (10 mL). The filtrate was washed with saturated  $\text{NaHCO}_3$  (3 x 5 mL), water (5 x 5 mL), brine (1 x 5 mL) and dried ( $\text{Na}_2\text{SO}_4$ ). The organic extract was filtered and concentrated *in vacuo*. The yellow oil was dissolved in acetonitrile (5 mL) and washed with pentane (4 x 5 mL) to remove residual triethylsilanol. The acetonitrile layer was concentrated to a viscous yellow oil, providing the aldehyde (71.5 mg, 91% yield) in good purity. Alternatively, the aldehyde could be subjected to flash chromatography (florisil, EtOAc: $\text{CHCl}_3$ , 1:19 to 2:3) to provide the title compound as a clear viscous oil (45.4 mg, 0.18 mmol) in 58% yield.

**TLC ( $\text{SiO}_2$ ):** 0.26 (1:4 EtOAc: $\text{CHCl}_3$ ).

**$^1\text{H NMR}$ :** (400 MHz,  $\text{CDCl}_3$ ):  $\delta$  = 9.81 – 9.74 (m, 1H), 6.87 (ddd,  $J=9.7, 5.6, 2.9$ , 1H), 6.01 (ddd,  $J=9.7, 2.4, 1.2$ , 1H), 4.75 (q,  $J=5.1$ , 1H), 4.72 – 4.63 (m, 1H), 4.18 (dddd,  $J=11.2, 7.5, 4.9, 2.5$ , 1H), 4.07 – 3.97 (m, 1H), 2.66 (ddd,  $J=16.7, 7.5, 2.4$ , 1H), 2.51 (ddd,  $J=16.7, 4.9, 1.6$ , 1H), 2.41 – 2.23 (m, 2H), 1.86 (ddd,  $J=14.6, 9.8, 2.4$ , 1H), 1.74 (ddd,  $J=14.6, 10.1, 2.7$ , 1H), 1.57 (dt,  $J=12.9, 2.5$ , 1H), 1.29-1.38 (m, 1H), 1.27 (d,  $J=5.1$ , 3H).

**$^{13}\text{C NMR}$ :** (100 MHz,  $\text{CDCl}_3$ ):  $\delta$  200.5, 164.4, 145.3, 121.5, 98.8, 73.9, 71.3, 71.2, 49.4, 41.5, 36.7, 30.0, 21.1.

**FTIR (neat):** 2918, 1716, 1380, 1342, 1248, 1133, 1096  $\text{cm}^{-1}$

**HRMS:** (ESI) Calcd. for  $\text{C}_{13}\text{H}_{18}\text{O}_5\text{Na}$  ( $\text{M}+\text{Na}$ ) $^+$ : 277.10460, Found: 277.10440.

**$[\alpha]^{22}_{\text{D}}$ :** +16.49  $^\circ$  (c = 0.93,  $\text{CHCl}_3$ ).

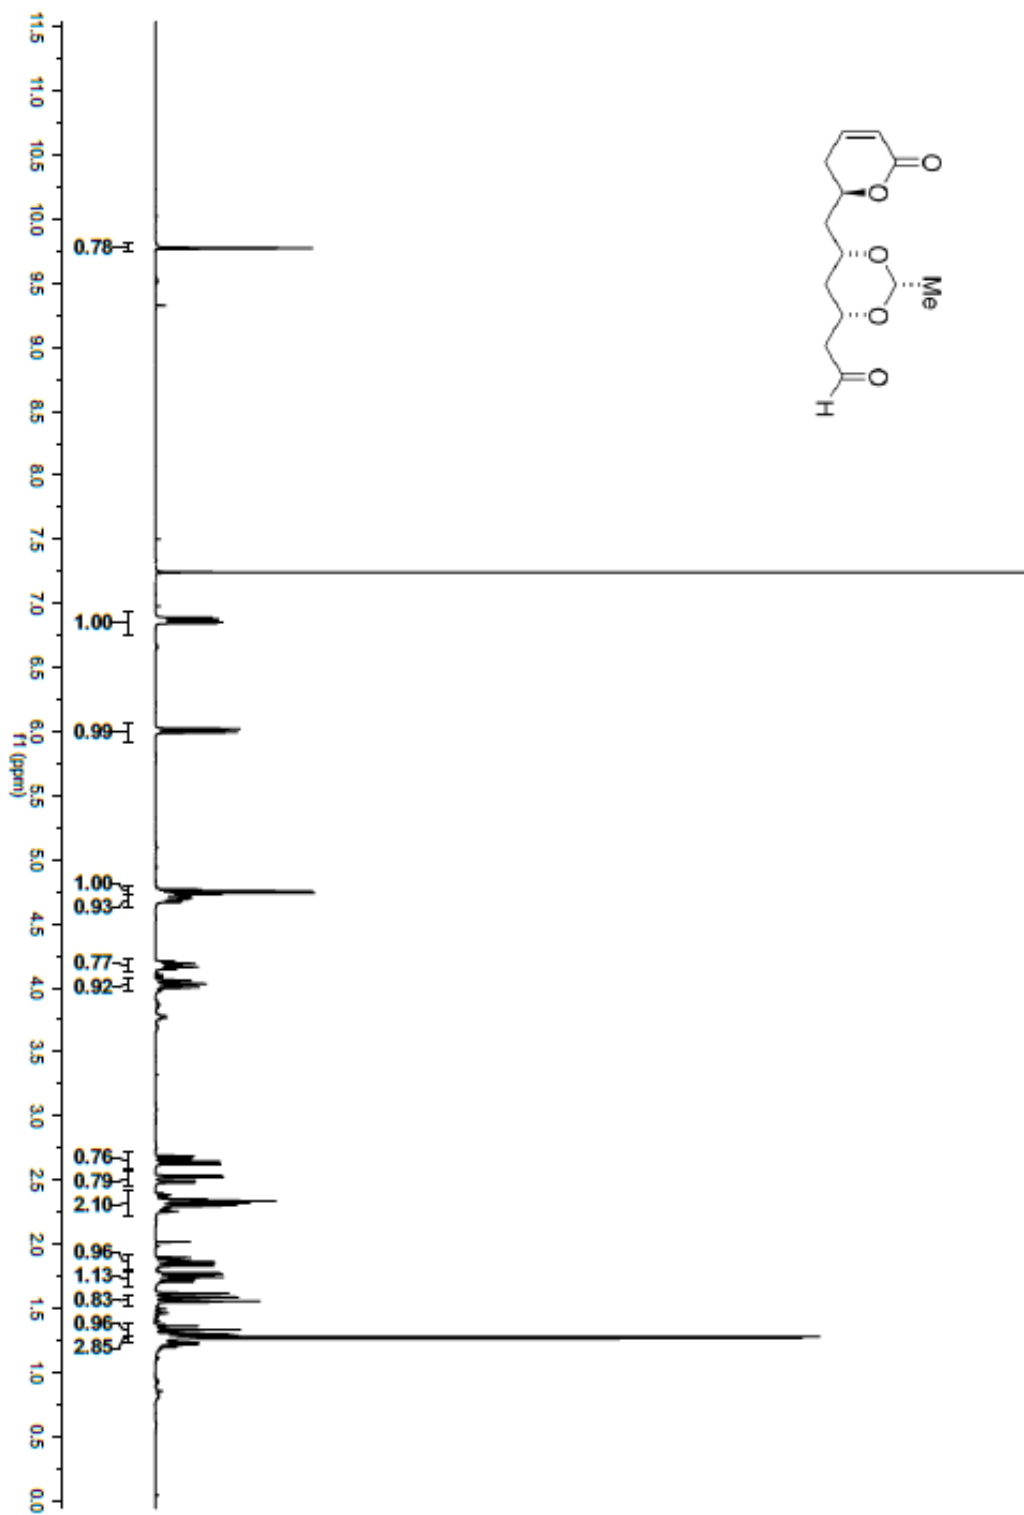

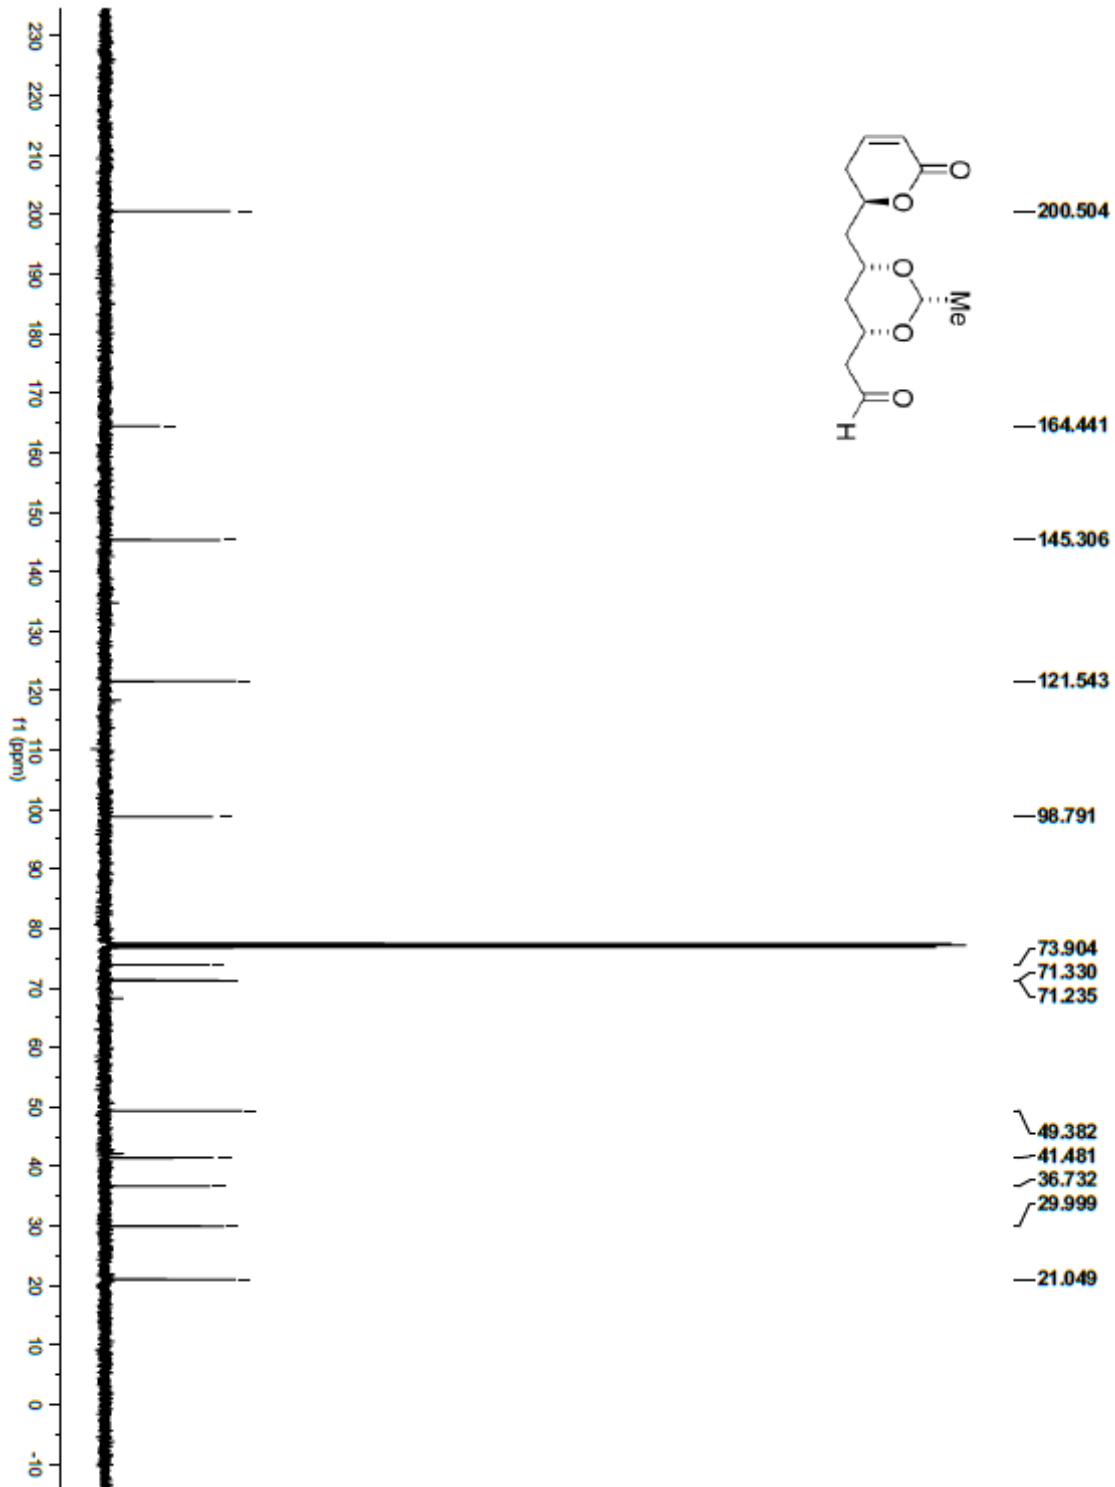

**(S)-nonadec-1-en-4-ol (5)**

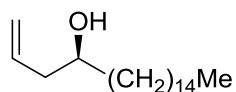

Cetyl alcohol (4.849 g, 20.0 mmol, 100 mol%), [Ir(cod)Cl]<sub>2</sub> (336.0 mg, 0.50 mmol, 2.5 mol%), (*R*)-BINAP (622.7 mg, 1.00 mmol, 5 mol%), 4-chloro-3-nitrobenzoic acid (403.1 mg, 2.00 mmol, 10 mol%), and Cs<sub>2</sub>CO<sub>3</sub> (1.303 g, 4.00 mmol, 20 mol%) were added to a flame-dried pressure tube. The solution was sparged with Ar for 5 minutes. Dry THF (100 mL, 0.2 M) was added followed by freshly distilled allyl acetate (4.4 mL, 40.0 mmol, 200 mol%) and the vessel was sealed. The reaction mixture was heated to 100 °C for 24 h. The reaction mixture was allowed to cool to room temperature, at which point the reaction mixture was filtered through a plug of Celite with the aid of THF. The volatiles were removed by *in vacuo* and the crude material was subjected to column chromatography (SiO<sub>2</sub>, Et<sub>2</sub>O:hexanes 1:19) to furnish the title compound (4.091 g, 14.4 mmol) as a waxy white solid in 72% yield.

**TLC (SiO<sub>2</sub>):** R<sub>f</sub> = 0.20 (1:19 ethyl acetate:hexanes)

**<sup>1</sup>H NMR:** (400 MHz, CDCl<sub>3</sub>): δ 5.85-5.78 (m, 1H), 5.16-5.14 (m, 1H), 5.13-5.11 (m, 1H), 3.65-3.63 (m, 1H), 2.30-2.27 (m, 1H), 2.17-2.12 (m, 1H), 1.56-1.54 (m, 1H), 1.47-1.43 (m, 3H), 1.34-1.23 (m, 25H), 0.89-0.86 (m, 3H).

**<sup>13</sup>C NMR:** (100 MHz, CDCl<sub>3</sub>): δ 135.1, 118.2, 70.8, 42.1, 37.0, 32.1, 29.8, 29.8, 29.5, 25.8, 22.9, 14.3.

**FTIR (neat):** ν 3319, 2915, 2849, 2360, 1636, 1470 cm<sup>-1</sup>.

**HRMS:** (CI) Calcd. for C<sub>19</sub>H<sub>39</sub>O (M+H)<sup>+</sup>: 283.3001, Found: 283.3000

**MP:** 47 - 48 °C

**[α]<sub>D</sub><sup>23</sup>:** -18.33 ° (c = 0.36, CHCl<sub>3</sub>).

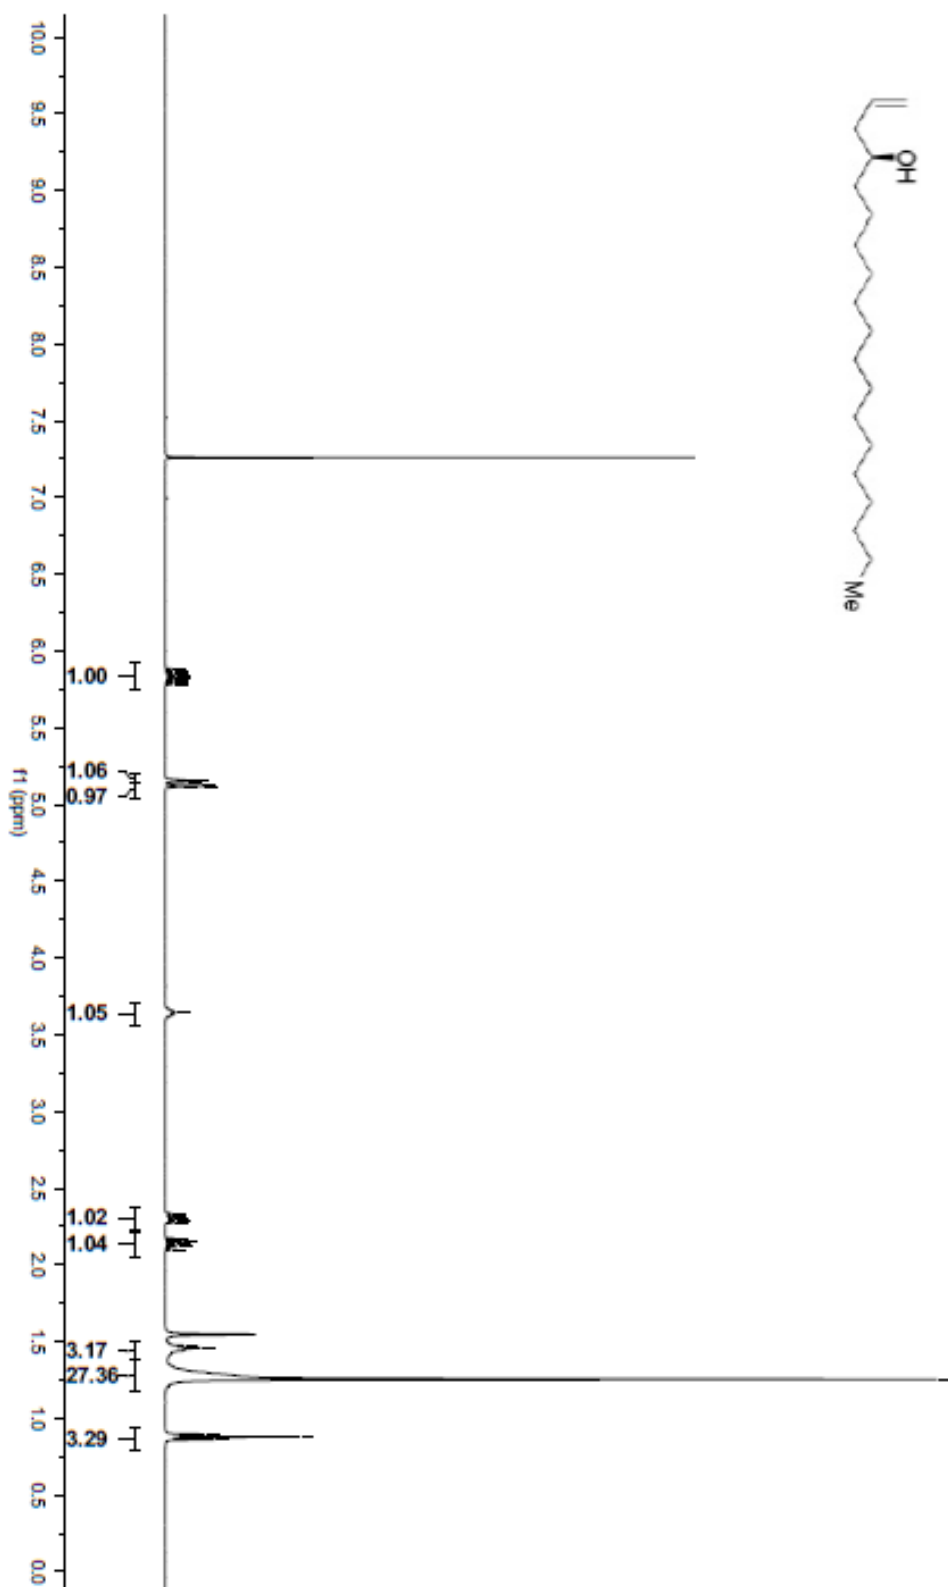

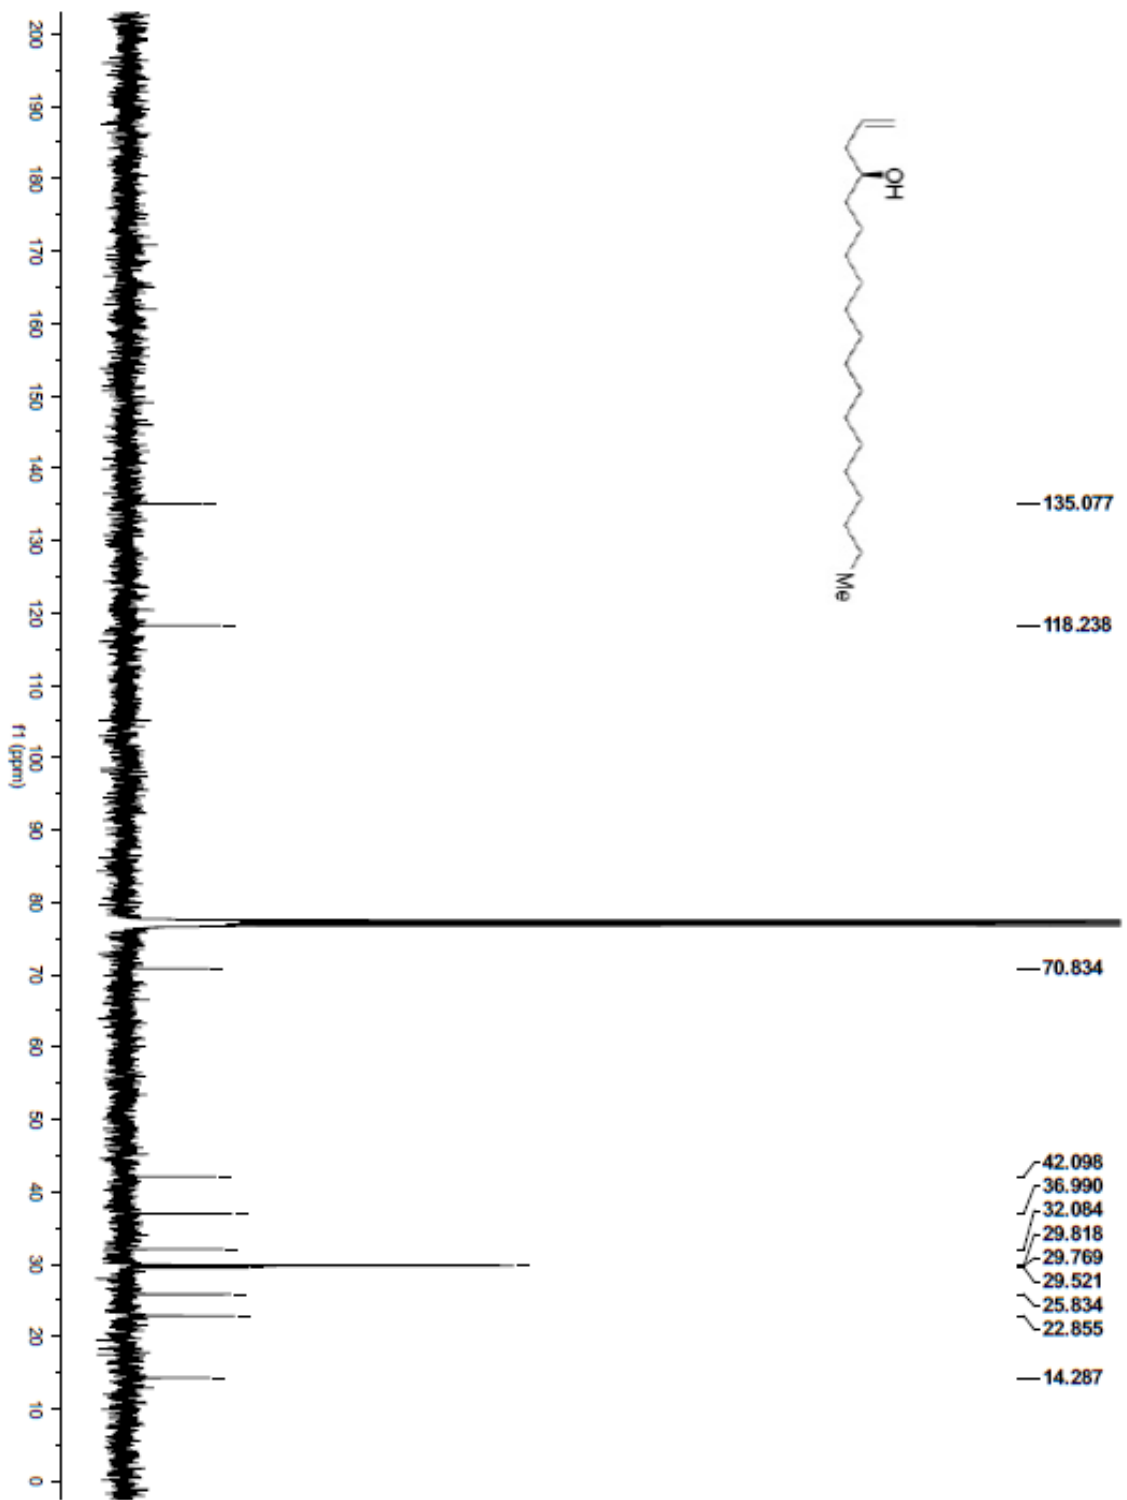



**(S)-1-methoxy-4-((nonadec-1-en-4-yloxy)methyl)benzene (6)**

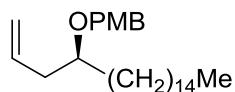

To a solution of alcohol **5** (1.009 g, 3.57 mmol, 100 mol%) in dry toluene (24 mL, 0.15 M) was added 4-methoxybenzyl-2,2,2-trichloroacetimidate (1.514 g, 5.36 mmol, 150 mol%) followed by La(OTf)<sub>3</sub> (0.1046 g, 0.179 mmol, 5 mol%). The solution was stirred at ambient temperature overnight. The reaction mixture was transferred to a separatory funnel containing H<sub>2</sub>O and hexanes. The aqueous phase was extracted with hexanes (5 x 35 mL) and the combined organic extracts were dried (Na<sub>2</sub>SO<sub>4</sub>), filtered and concentrated *in vacuo* onto silica gel. The residue was subjected to column chromatography (SiO<sub>2</sub>, Et<sub>2</sub>O:hexanes 1:19) to furnish the title compound (1.333 g, 3.32 mmol) as a colorless oil in 93% yield.

**TLC (SiO<sub>2</sub>):** R<sub>f</sub> = 0.36 (1:19 Et<sub>2</sub>O:hexanes)

**<sup>1</sup>H NMR:** (400 MHz, CDCl<sub>3</sub>): δ 7.29-7.25 (m, 2H), 6.89-6.85 (m, 2H), 5.85 (ddt, *J* = 17.2, 10.1, 7.1 Hz, 1H), 5.11-5.03 (m, 2H), 4.46 (q, *J* = 15.2 Hz, 2H), 3.80 (s, 3H), 3.41 (qd, *J* = 6.0, 5.5 Hz, 1H), 2.34-2.28 (m, 2H), 1.54-1.46 (m, 2H), 1.34-1.21 (m, 26H), 0.88 (t, *J* = 6.9 Hz, 3H).

**<sup>13</sup>C NMR:** (100 MHz, CDCl<sub>3</sub>): δ 159.0, 135.2, 131.0, 129.3, 116.7, 113.7, 78.2, 70.5, 55.3, 38.3, 33.8, 31.9, 29.7, 29.7, 29.7, 29.7, 29.6, 29.4, 25.4, 22.7, 14.1.

**FTIR (neat):** ν 2924, 2853, 1513, 1247, 1215, 1037 cm<sup>-1</sup>.

**HRMS:** (ESI) Calcd. for C<sub>27</sub>H<sub>46</sub>O<sub>2</sub>Na (M+Na)<sup>+</sup>: 425.3396, Found: 425.3372

**[α]<sub>D</sub><sup>24</sup>:** -3.62 ° (c = 0.57, CHCl<sub>3</sub>).

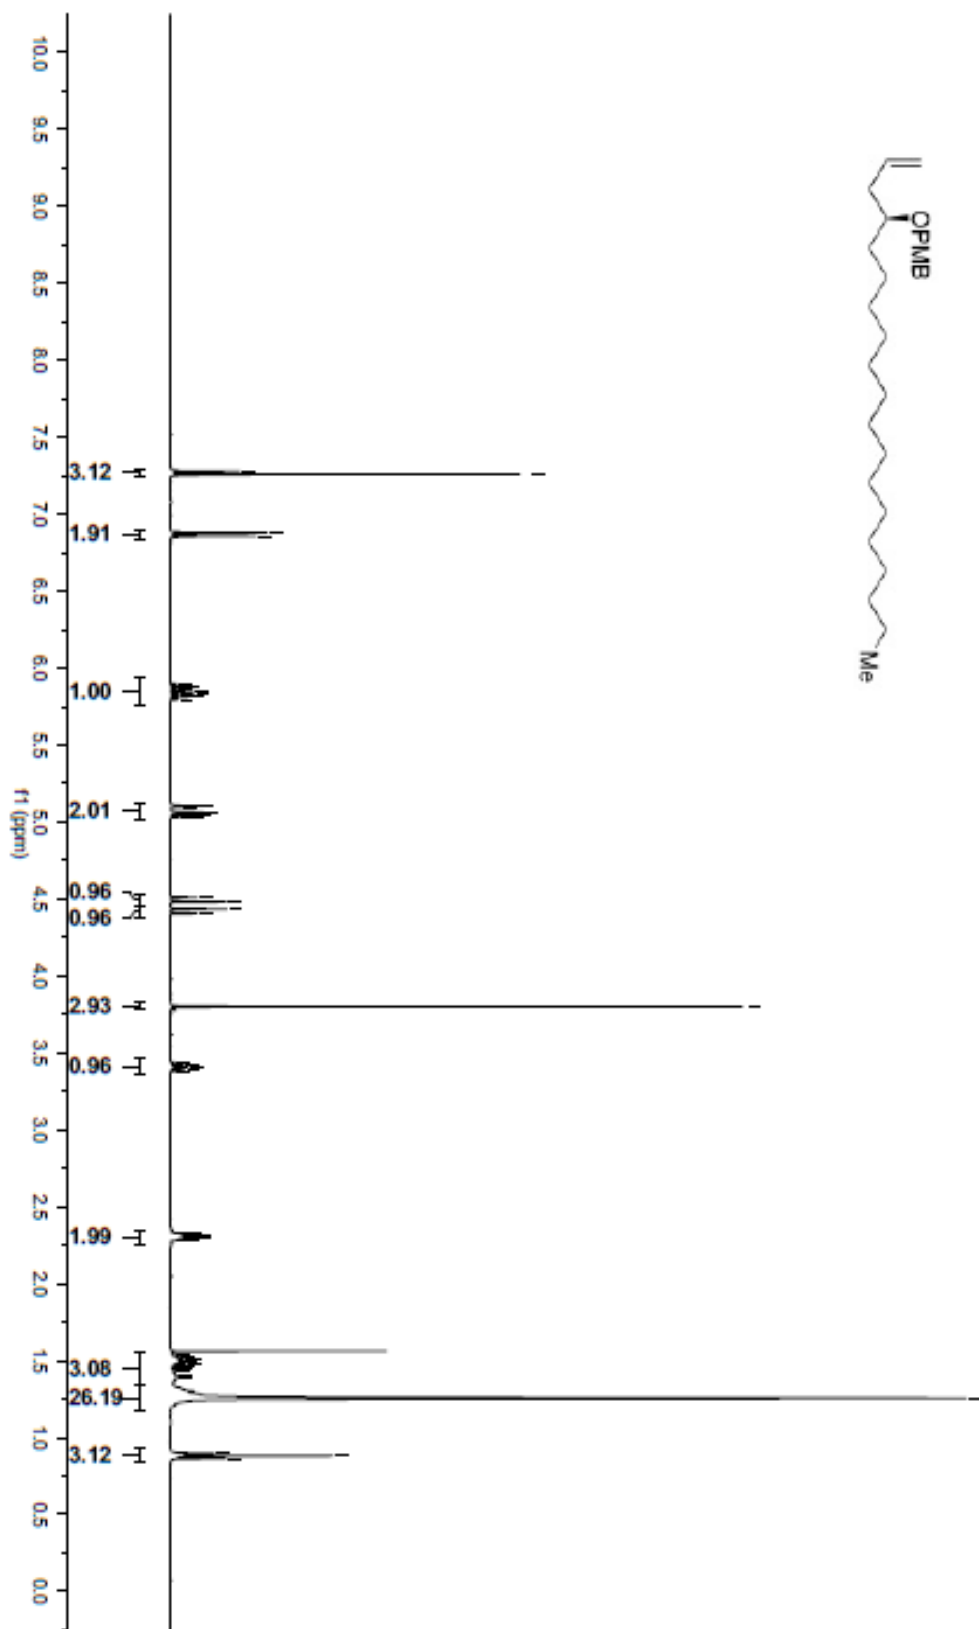

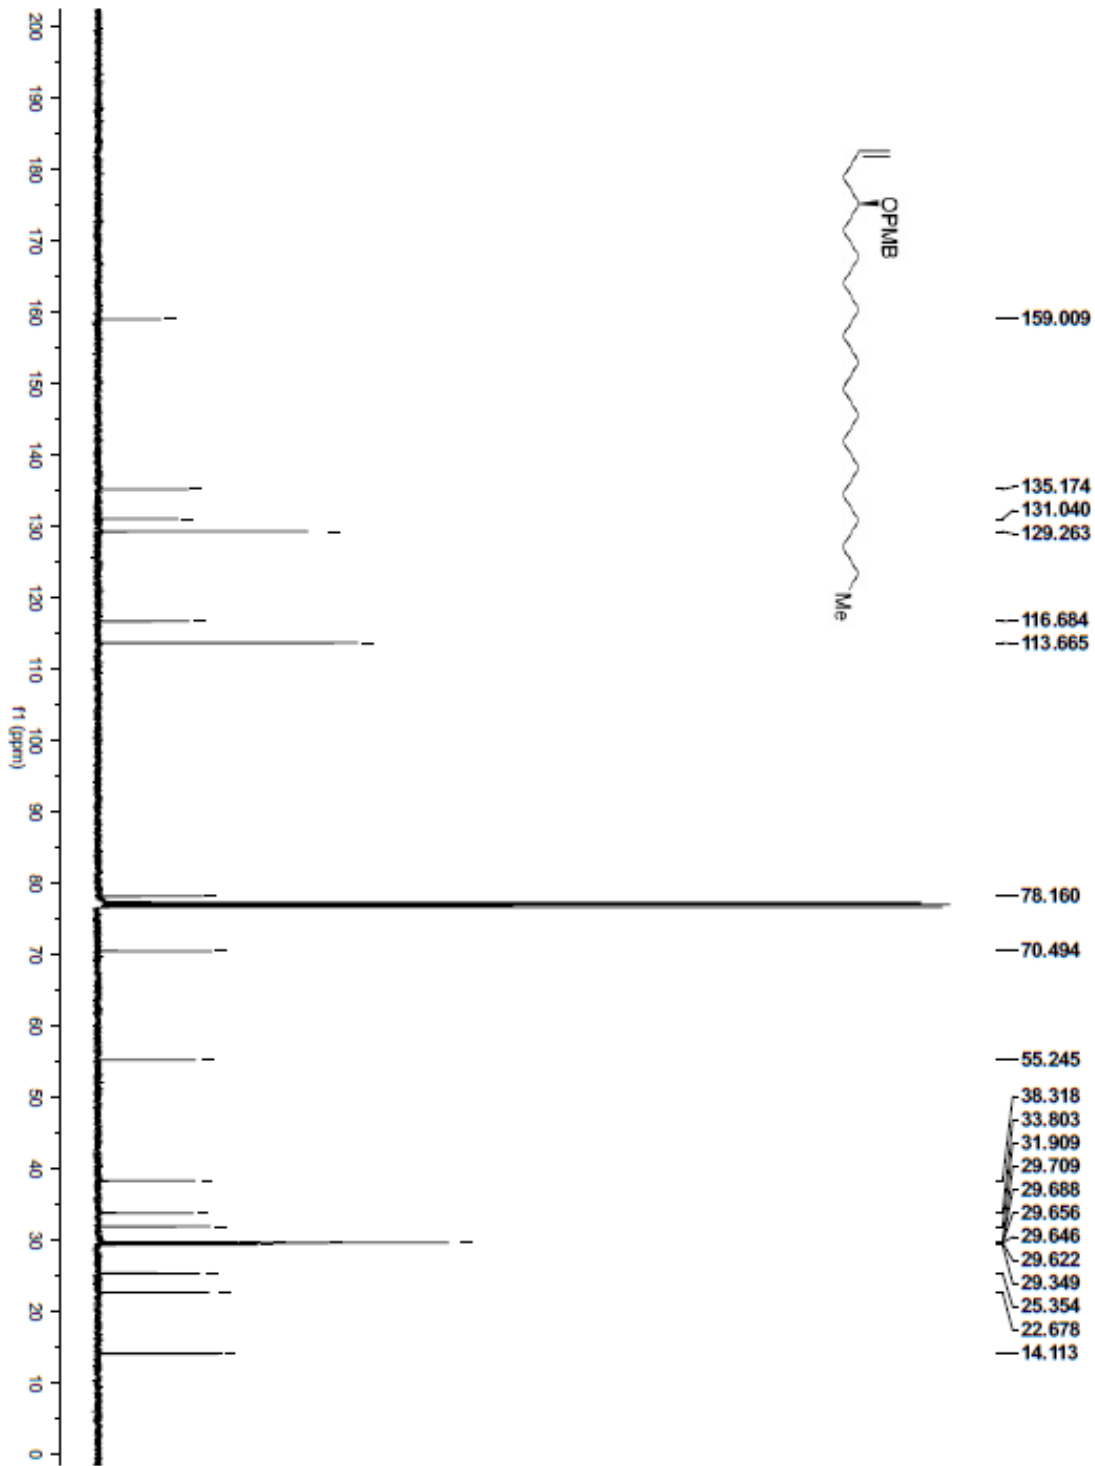

**(S)-4-((4-methoxybenzyl)oxy)nonadecan-2-one (Fragment B)**

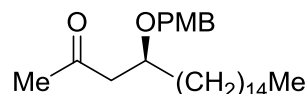

The following procedure was performed in the dark. To a sealed tube was added Pd(Quinox)Cl<sub>2</sub> (7.1 mg, 0.0159 mmol, 5 mol%) and AgSbF<sub>6</sub> (16.2 mg, 0.0472 mmol, 12.5 mol%) followed by CH<sub>2</sub>Cl<sub>2</sub> (2.8 mL). The solution was stirred at ambient temperature for 10 minutes, at which point <sup>t</sup>BuOOH (70% w/w, 0.64 mL, 4.54 mmol, 1200 mol%) was added and the reaction vessel was transferred to an ice water bath. After 10 minutes, PMB ether **6** (152.2 mg, 0.378 mmol, 100 mol%) in CH<sub>2</sub>Cl<sub>2</sub> (1.0 mL, 0.1 M overall) was added dropwise. The reaction was warmed to ambient temperature and was allowed to stir for 16 h. The reaction mixture was diluted with hexanes and was washed with saturated Na<sub>2</sub>S<sub>2</sub>O<sub>3</sub> (2 x 10 mL). The aqueous portion was then extracted with hexanes (2 x 15 mL) and the combined organic extracts were dried (Na<sub>2</sub>SO<sub>4</sub>), filtered and concentrated *in vacuo*. The residue was subjected to column chromatography (SiO<sub>2</sub>, Et<sub>2</sub>O:CHCl<sub>3</sub> 1:99) to furnish the title compound (112.3 mg, 0.27 mmol) as a colorless oil in 71% yield.

**TLC (SiO<sub>2</sub>):** R<sub>f</sub> = 0.45 (1:4 EtOAc:hexanes)

**<sup>1</sup>H NMR** (400 MHz, CDCl<sub>3</sub>) δ = 7.23 (d, *J*=8.7, 2H), 6.86 (d, *J*=8.7, 2H), 4.46 (d, *J*=10.9, 1H), 4.41 (d, *J*=10.9, 1H), 3.94 – 3.84 (m, 1H), 3.79 (s, 3H), 2.73 (dd, *J*=15.7, 7.6, 1H), 2.49 (dd, *J*=15.8, 4.8, 1H), 2.15 (s, 3H), 1.25 (s, 28H), 0.88 (t, *J*=6.9, 3H).

**<sup>13</sup>C NMR** (100 MHz, CDCl<sub>3</sub>) δ = 207.9, 159.1, 130.6, 129.4, 113.7, 75.3, 71.1, 55.3, 55.2, 48.6, 34.3, 31.9, 31.2, 31.2, 29.7, 29.6, 29.4, 25.2, 22.7, 14.1.

**FTIR (neat):** 2922, 2852, 1717, 1613, 1513, 1465, 1356, 1249 cm<sup>-1</sup>

**HRMS:** (ESI) Calcd. for C<sub>27</sub>H<sub>46</sub>O<sub>2</sub>Na (M+Na)<sup>+</sup>: 425.3396, Found: 425.3372

**[α]<sub>D</sub><sup>24</sup>:** +6.03 ° (c = 0.94, CHCl<sub>3</sub>).

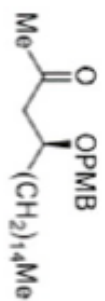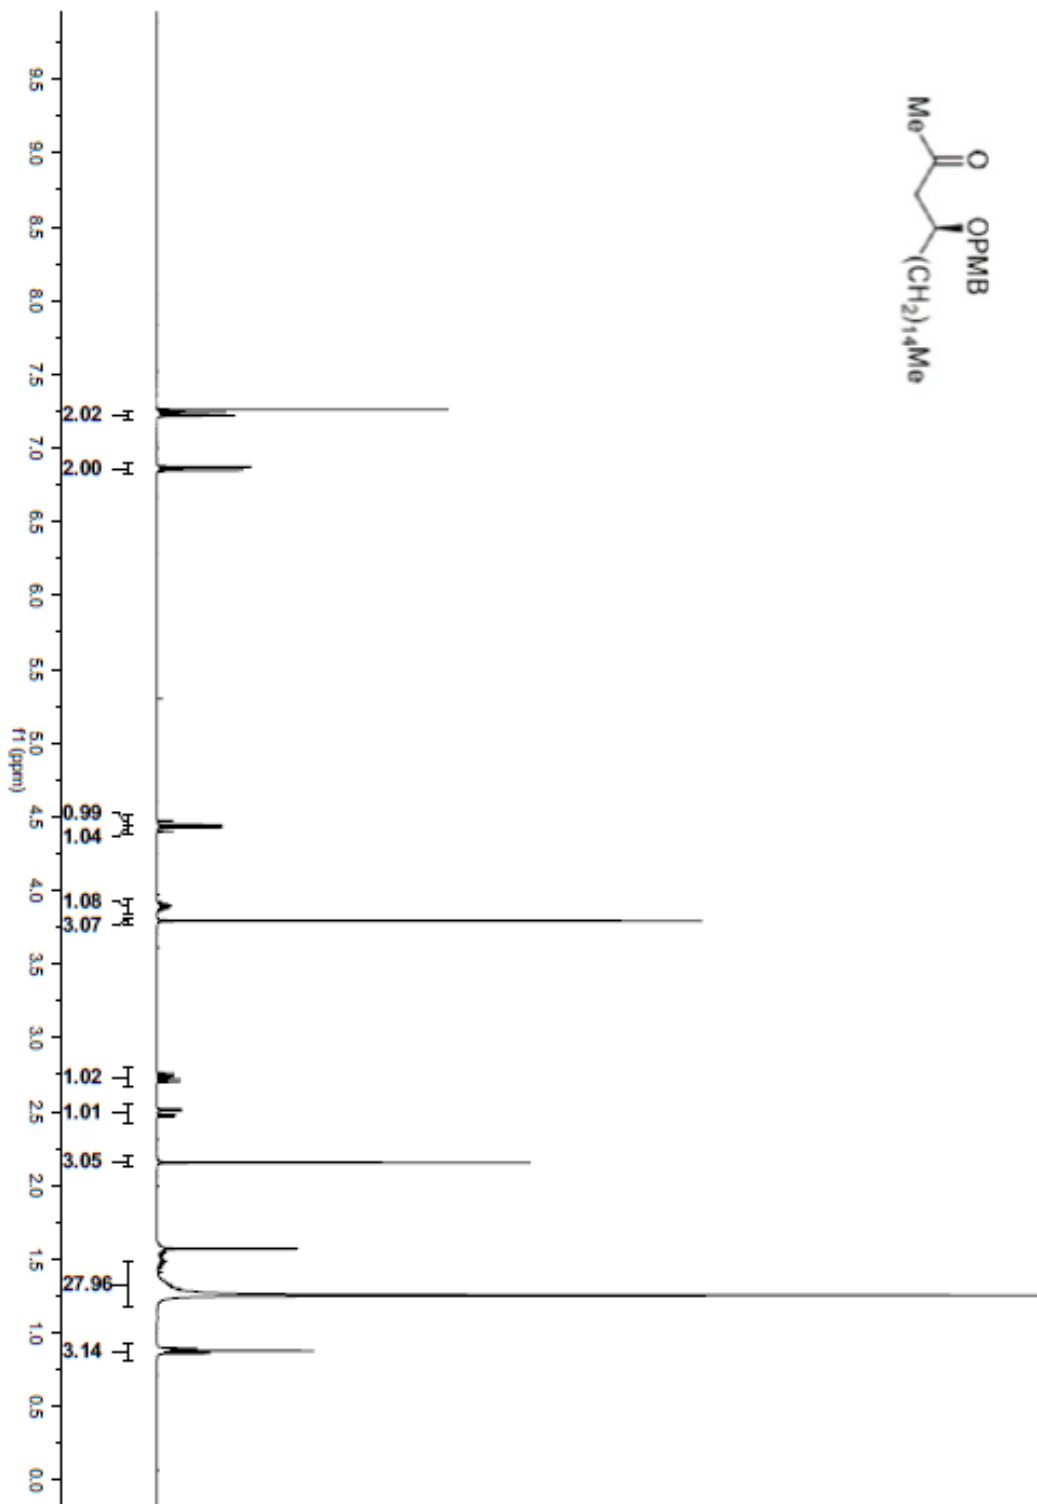

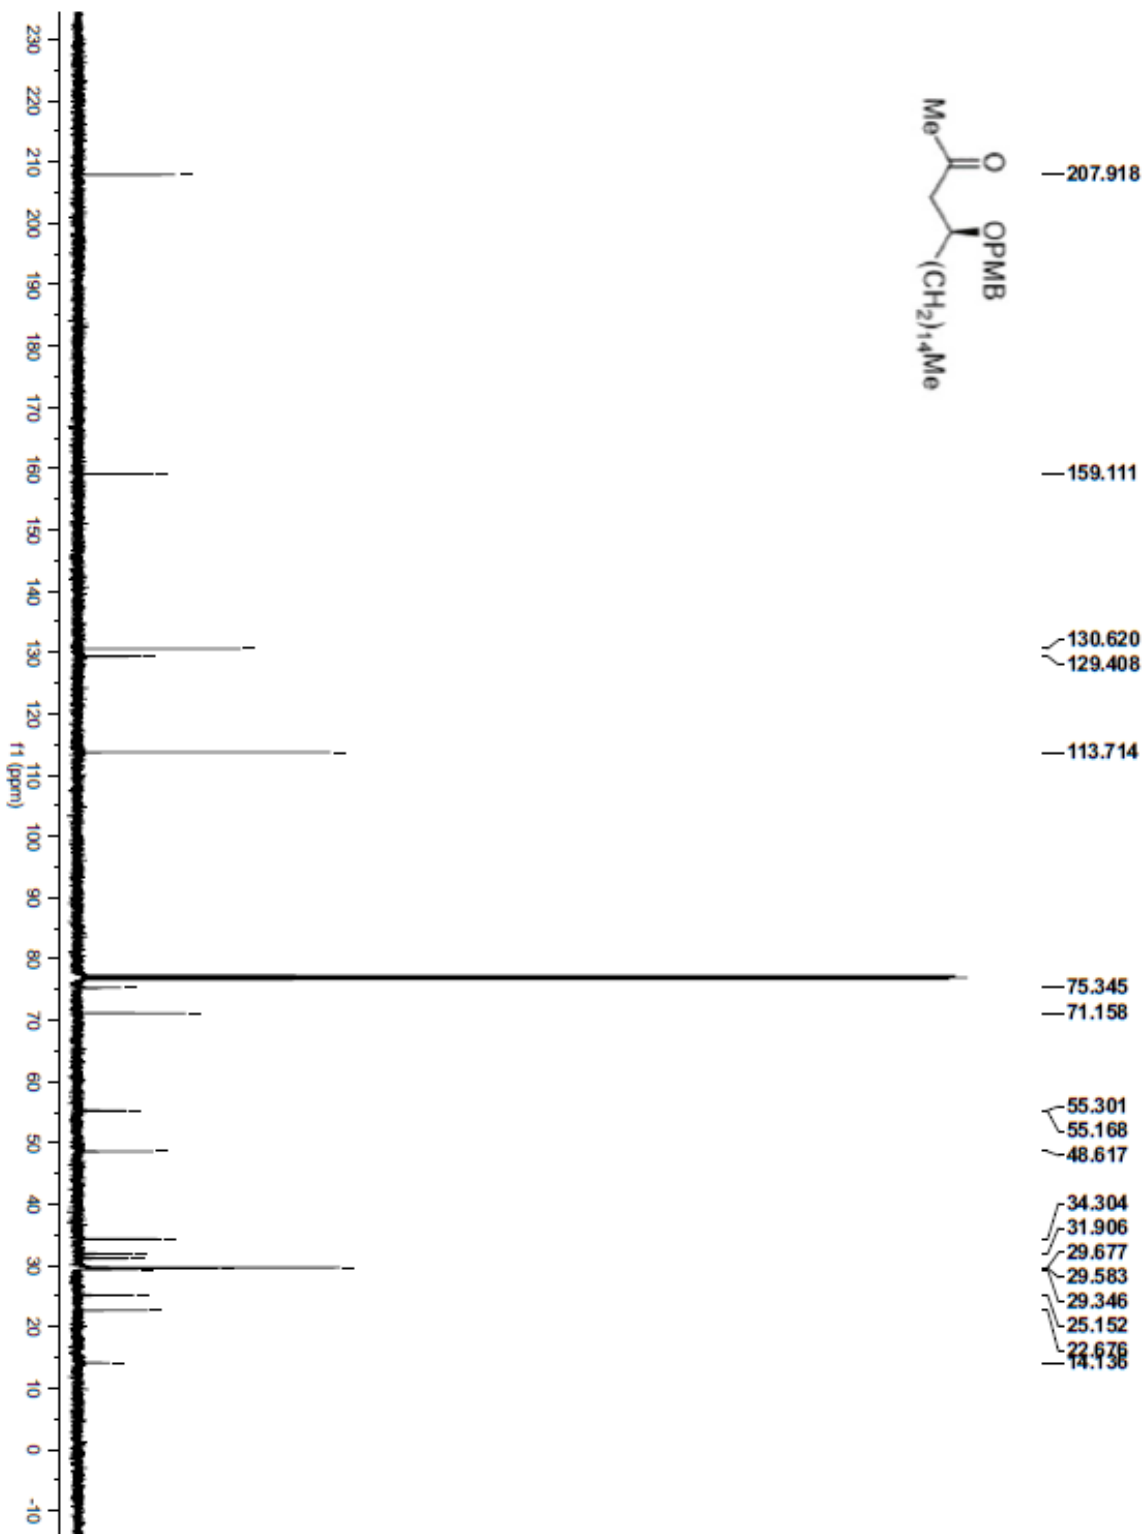

**(6R)-6-(((4R,6R)-6-((2S,6S)-2-hydroxy-6-((4-methoxybenzyl)oxy)-4-oxohenicosyl)-2-methyl-1,3-dioxan-4-yl)methyl)-5,6-dihydro-2H-pyran-2-one(7)**

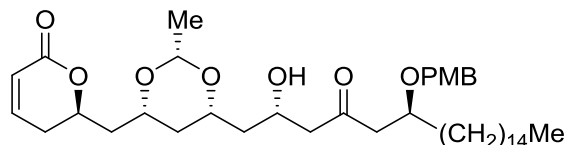

To a 50 mL round bottom flask was charged with ketone **Fragment B** (205.7 mg, 0.491 mmol, 125 mol%) was added diethyl ether (9.0 mL, 0.05 M). The solution was sparged with argon and cooled to -30 °C. Dicyclohexylchloroborane (208.9, 0.983 mmol, 250 mol%) was injected neat via syringe and the mixture was stirred vigorously for 15 minutes. Triethylamine (107.9 mg, 1.06 mmol, 270 mol%) was injected via syringe and the cloudy mixture was allowed to stir for 30 minutes. The mixture was cooled to -78 °C and a solution of aldehyde **Fragment A** (100 mg, 0.393 mmol, 100 mol%) in diethyl ether (800  $\mu$ L) was added dropwise with stirring. The mixture was allowed to stir for 1.5 h, then warmed to 0 °C. A solution of methanol, pH 7 buffer and 30% hydrogen peroxide (1:1:1, 6 mL) was added. The biphasic mixture was allowed to stir overnight, washed with saturated NaHCO<sub>3</sub> (3 x 10 mL), brine (1 x 10 mL) and dried (Na<sub>2</sub>SO<sub>4</sub>). The organic extract was filtered and concentrated *in vacuo*. The clear residual oil was subjected to flash column chromatography (SiO<sub>2</sub>, acetone:hexanes 1:9 to 1:4) to furnish the title compound as a clear, colorless oil (168.5 mg, 0.25 mmol) in 64% yield.

**TLC (SiO<sub>2</sub>):** R<sub>f</sub> = 0.31 (1:2 acetone:hexanes)

**<sup>1</sup>H NMR:** (400 MHz, CDCl<sub>3</sub>):  $\delta$  = 7.24 – 7.18 (m, 2H), 6.92 – 6.81 (m, 3H), 6.03 (ddd,  $J$ =9.7, 2.4, 1.1, 1H), 4.78 – 4.66 (m, 2H), 4.46 (d,  $J$ =10.9, 1H), 4.39 (d,  $J$ =10.9, 1H), 4.27 (dq,  $J$ =12.0, 3.9, 1H), 4.00 (ddd,  $J$ =13.5, 3.9, 1.6, 1H), 3.95 – 3.84 (m, 2H), 3.79 (s, 3H), 3.44 (s, 1H), 2.75 (dd,  $J$ =15.8, 7.9, 1H), 2.63 (dd,  $J$ =16.9, 7.8, 1H), 2.52 (ddd,  $J$ =18.4, 16.4, 4.5, 2H), 2.42 – 2.25 (m, 2H), 1.87 (ddd,  $J$ =14.6, 9.7, 2.3, 1H), 1.80 – 1.65 (m, 2H), 1.60 – 1.42 (m, 3H), 1.36 – 1.18 (m, 31H), 0.87 (t,  $J$ =6.9, 3H).

**<sup>13</sup>C NMR:** (100 MHz, CDCl<sub>3</sub>):  $\delta$  209.8, 164.5, 159.3, 145.3, 130.7, 129.5, 121.6, 113.9, 98.5, 75.6, 75.5, 74.0, 71.5, 71.4, 66.5, 55.4, 50.9, 48.8, 41.5, 37.0, 34.4, 32.1, 30.0, 29.9, 29.8, 29.8, 29.5, 25.3, 22.8, 21.2, 14.3.

**FTIR (neat):** 3529, 3432, 2923, 2853, 1810, 1713, 1613, 1587, 1514, 1487, 1465, 1380, 1342, 1248, 1171, 1138, 1094, 1058, 1035 cm<sup>-1</sup>.

**HRMS:** (ESI) Calcd. for C<sub>40</sub>H<sub>64</sub>O<sub>8</sub>Na (M+Na)<sup>+</sup>: 695.4499, Found: 695.4495.

**$[\alpha]_D^{22}$ :** -11.81° (c = 0.57, CHCl<sub>3</sub>).

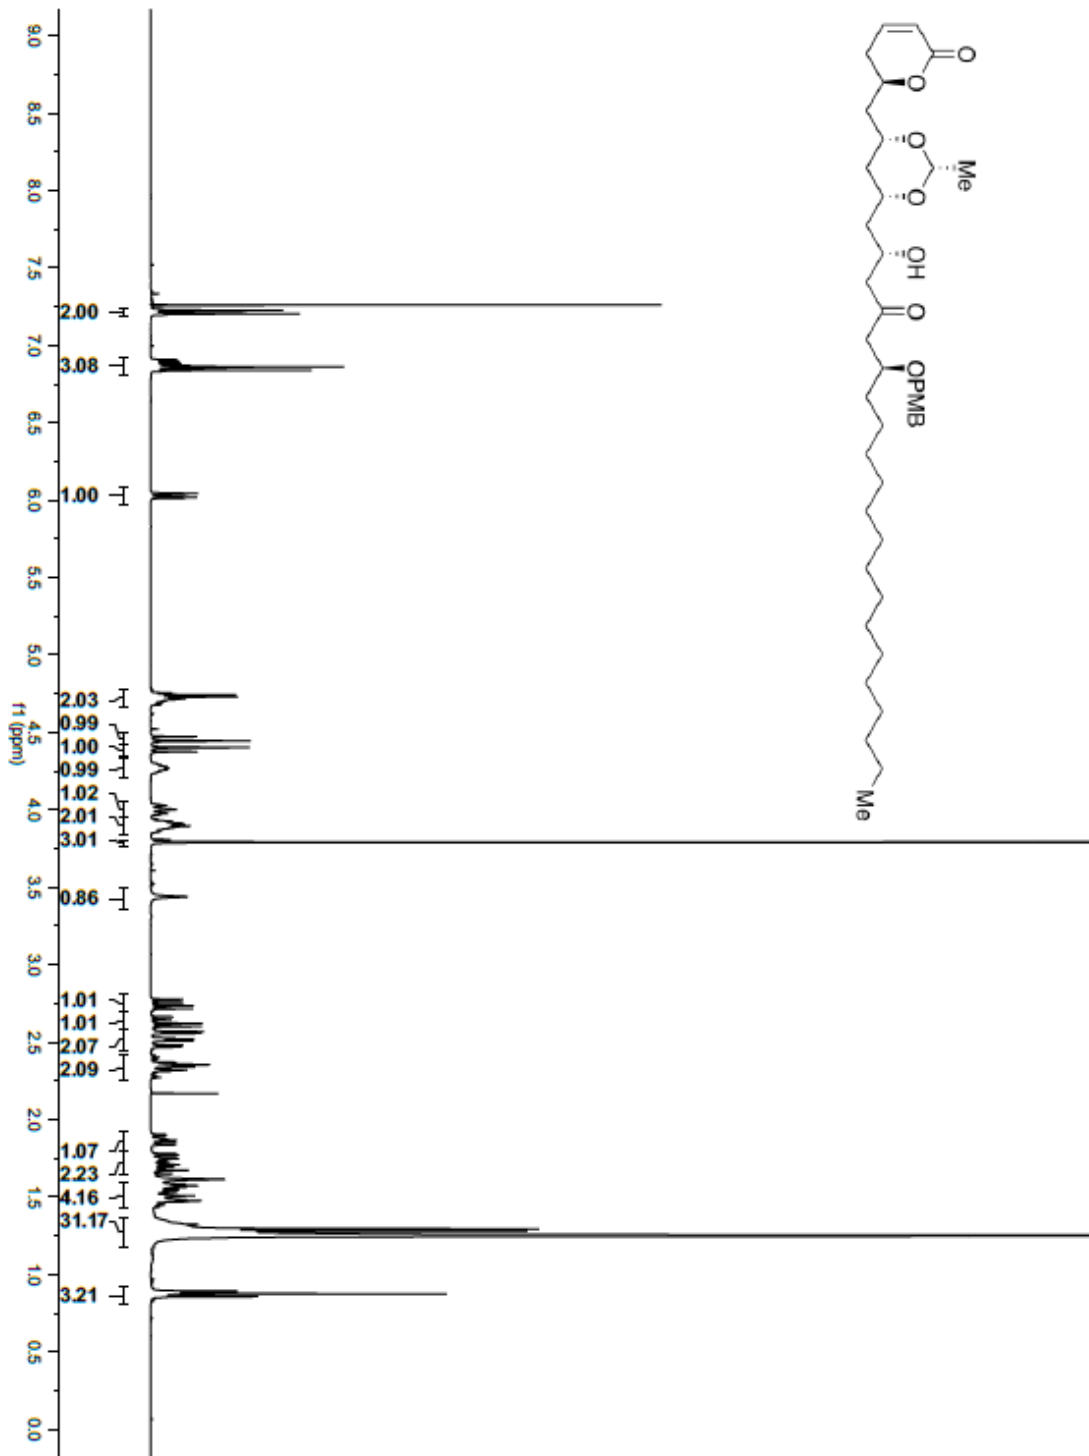



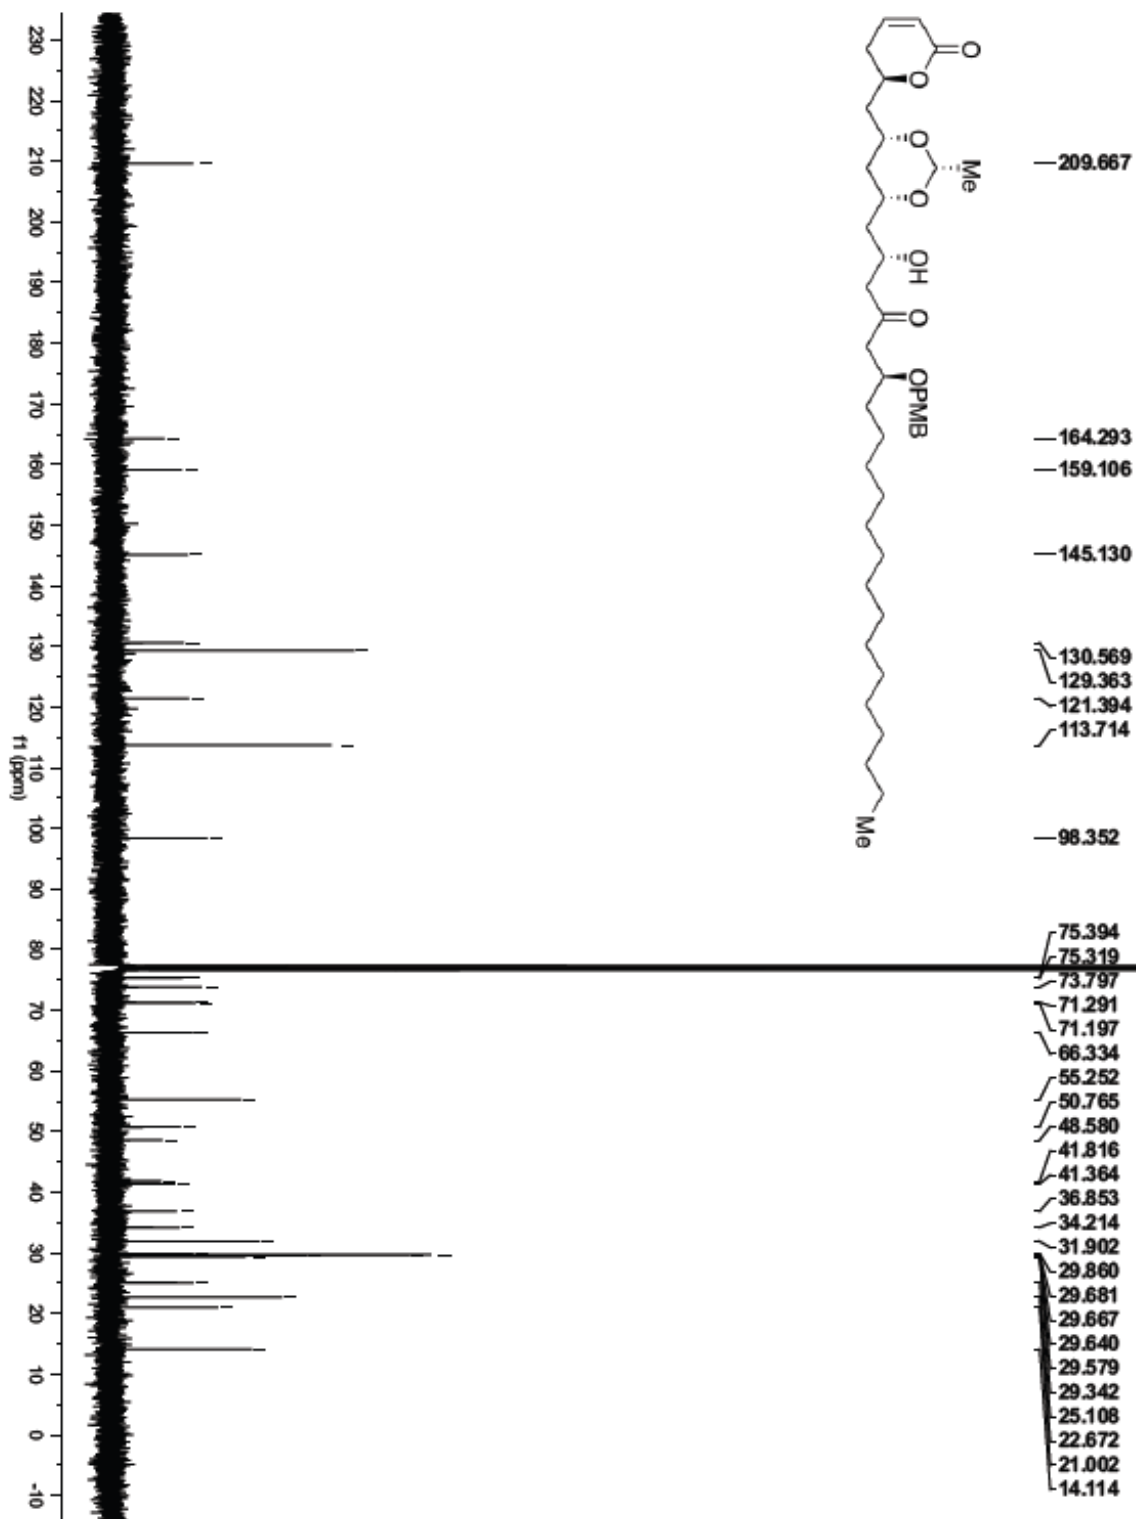

**(6R)-6-(((4R,6R)-6-((2R,4S,6S)-2,4-dihydroxy-6-((4-methoxybenzyl)oxy)henicosyl)-2-methyl-1,3-dioxan-4-yl)methyl)-5,6-dihydro-2H-pyran-2-one (8)**

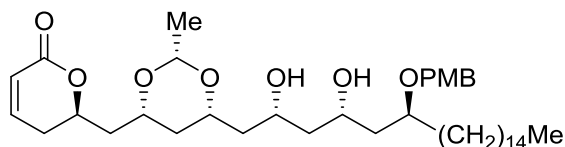

To a solution of ketone **7** (67.2 mg, 0.100 mmol, 100 mol%) in THF:MeOH (4:1, 0.1 M, 1 mL) at -78 °C under an atmosphere of argon was added diethylmethoxy borane (200 uL, 1.0 M in THF, 0.2 mmol, 200 mol%). The mixture was allowed to stir for 30 minutes, at which point NaBH<sub>4</sub> (220 uL, 0.5 M in diglyme, 0.110 mmol, 110 mol%) was added. After stirring for 3 hours at -78 °C, the mixture was warmed to 0 °C and diluted with diethyl ether (10 mL) and stirred vigorously with a mixture of methanol, pH 7 buffer and 30% hydrogen peroxide (1.5 mL, 1:1:1) as the solution warmed to room temperature. After 1 h at room temperature, the organic phase was washed with saturated NaHCO<sub>3</sub> (3 x 5 mL), brine (1 x 5 mL), dried (Na<sub>2</sub>SO<sub>4</sub>), filtered and concentrated *in vacuo* to provide the title compound as a yellow oil (63.2 mg, 0.094 mmol) in 94% yield.

**TLC (SiO<sub>2</sub>):** R<sub>f</sub> = 0.24 (3:7 acetone:hexanes)

**<sup>1</sup>H NMR:** (400 MHz, CDCl<sub>3</sub>): δ = 7.29 – 7.23 (m, 2H), 6.94 – 6.80 (m, 3H), 6.03 (ddd, *J*=9.7, 2.4, 1.1, 1H), 4.76 (q, *J*=5.2, 1H), 4.74 – 4.66 (m, 1H), 4.51 (d, *J*=11.0, 1H), 4.46 (d, *J*=11.0, 1H), 4.19 – 3.96 (m, 3H), 3.90 (ddd, *J*=21.3, 8.6, 6.4, 3H), 3.80 (s, 3H), 3.74 – 3.63 (m, 1H), 2.43 – 2.25 (m, 2H), 1.88 (ddd, *J*=14.6, 9.7, 2.4, 1H), 1.80 – 1.71 (m, 2H), 1.71 – 1.37 (m, 8H), 1.36 – 1.20 (m, 30H), 0.88 (t, *J*=6.9, 3H).

**<sup>13</sup>C NMR:** (100 MHz, CDCl<sub>3</sub>): δ 164.4, 159.4, 145.3, 130.8, 129.7, 121.6, 114.0, 98.5, 76.6, 76.0, 74.0, 71.6, 71.2, 69.2, 55.4, 44.0, 43.2, 41.6, 41.3, 37.2, 34.0, 32.1, 30.1, 29.0, 30.85, 29.8 (3C), 29.5, 25.5, 22.8, 21.2, 14.3.

**FTIR (neat):** 3488, 2924, 2853, 1716, 1248 cm<sup>-1</sup>.

**HRMS:** (ESI) Calcd. for C<sub>40</sub>H<sub>66</sub>O<sub>8</sub>Na (M+Na)<sup>+</sup>: 697.46500, Found: .697.46500

**[α]<sup>22</sup><sub>D</sub>:** +19.87 ° (c = 0.52, CHCl<sub>3</sub>).

**Synthesis of 8 starting from crude Fragment A:** Due to the instability of **Fragment A** during storage and the instability of the aldol product **7** during chromatography, procedures were developed to carry out the aldol and reduction with crude reaction products. A 10 mL screw cap vial was charged with stir bar and solution of ketone **Fragment B** (41.9 mg, 0.1 mmol, 100 mol%) in diethyl ether (1 mL). The vial was sealed and the solution sparged with argon, then cooled to -30 °C. Chlorodicyclohexylborane (31.9 mg, 1.5 mmol, 150 mol%) was injected neat, resulting in a yellow solution. After 5 min, triethylamine (20.3 mg, 0.200 mmol, 200 mol%) was injected and a cloudy mixture formed immediately. The mixture was allowed to stir for 30 minutes, then cooled to -78 °C. Crude aldehyde **Fragment A** (31.8mg, 0.125 mmol, 125 mol%) in diethyl ether (1 mL) was added dropwise. After 4 hours, the mixture was warmed 0 °C and a solution of methanol, pH 7 buffer and 30% hydrogen peroxide (1:1:1, 6 mL) was added. The biphasic mixture was allowed to stir overnight at room temperature, extracted with diethyl ether (3 x 5 mL), washed with saturated NaHCO<sub>3</sub> (3 x 10 mL), brine (1 x 10 mL) and dried (Na<sub>2</sub>SO<sub>4</sub>). The organic extract was filtered and concentrated *in vacuo* to furnish a clear oil. The oil was dissolved in acetonitrile (5 mL), washed with pentane (4 x 5 mL) to remove methyl ketone **Fragment B**, then concentrated *in vacuo* to a clear oil, providing crude aldol (64.8 mg) in good purity. The methyl ketone **Fragment B** could be recovered from the pentane extract (6.2 mg, 15%).

A 10 mL screw cap vial was charged with crude aldol **7** (64.8 mg, 0.0964 mmol) and dissolved in THF/MeOH (4:1, 1 mL). The solution was cooled to -78 °C and diethylmethoxyborane (1.0 M in THF, 0.2 mL, 200 mol%) was added dropwise. The cloudy solution was stirred for 30 minutes then NaBH<sub>4</sub> (0.5 M in diglyme, 0.22 mL, 110 mol%) was added dropwise. The mixture was allowed to stir for 3 h, then warmed to 0 °C, diluted with diethyl ether (10 mL), and stirred vigorously with a mixture of methanol, pH 7 buffer, and 30% hydrogen peroxide (1.5 mL, 1:1:1) allowing the solution to warm to room temperature. After 1 h at room temperature, the organic phase was washed with saturated NaHCO<sub>3</sub> (3 x 5 mL), brine (1 x 5 mL), dried (Na<sub>2</sub>SO<sub>4</sub>), filtered and concentrated. The yellow oil was subjected to flash column chromatography (SiO<sub>2</sub>, 1:4 to 3:7 acetone:hexanes) to furnish the diol as a colorless oil (49.3 mg, 73% over two steps).

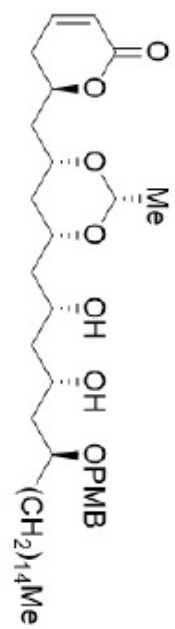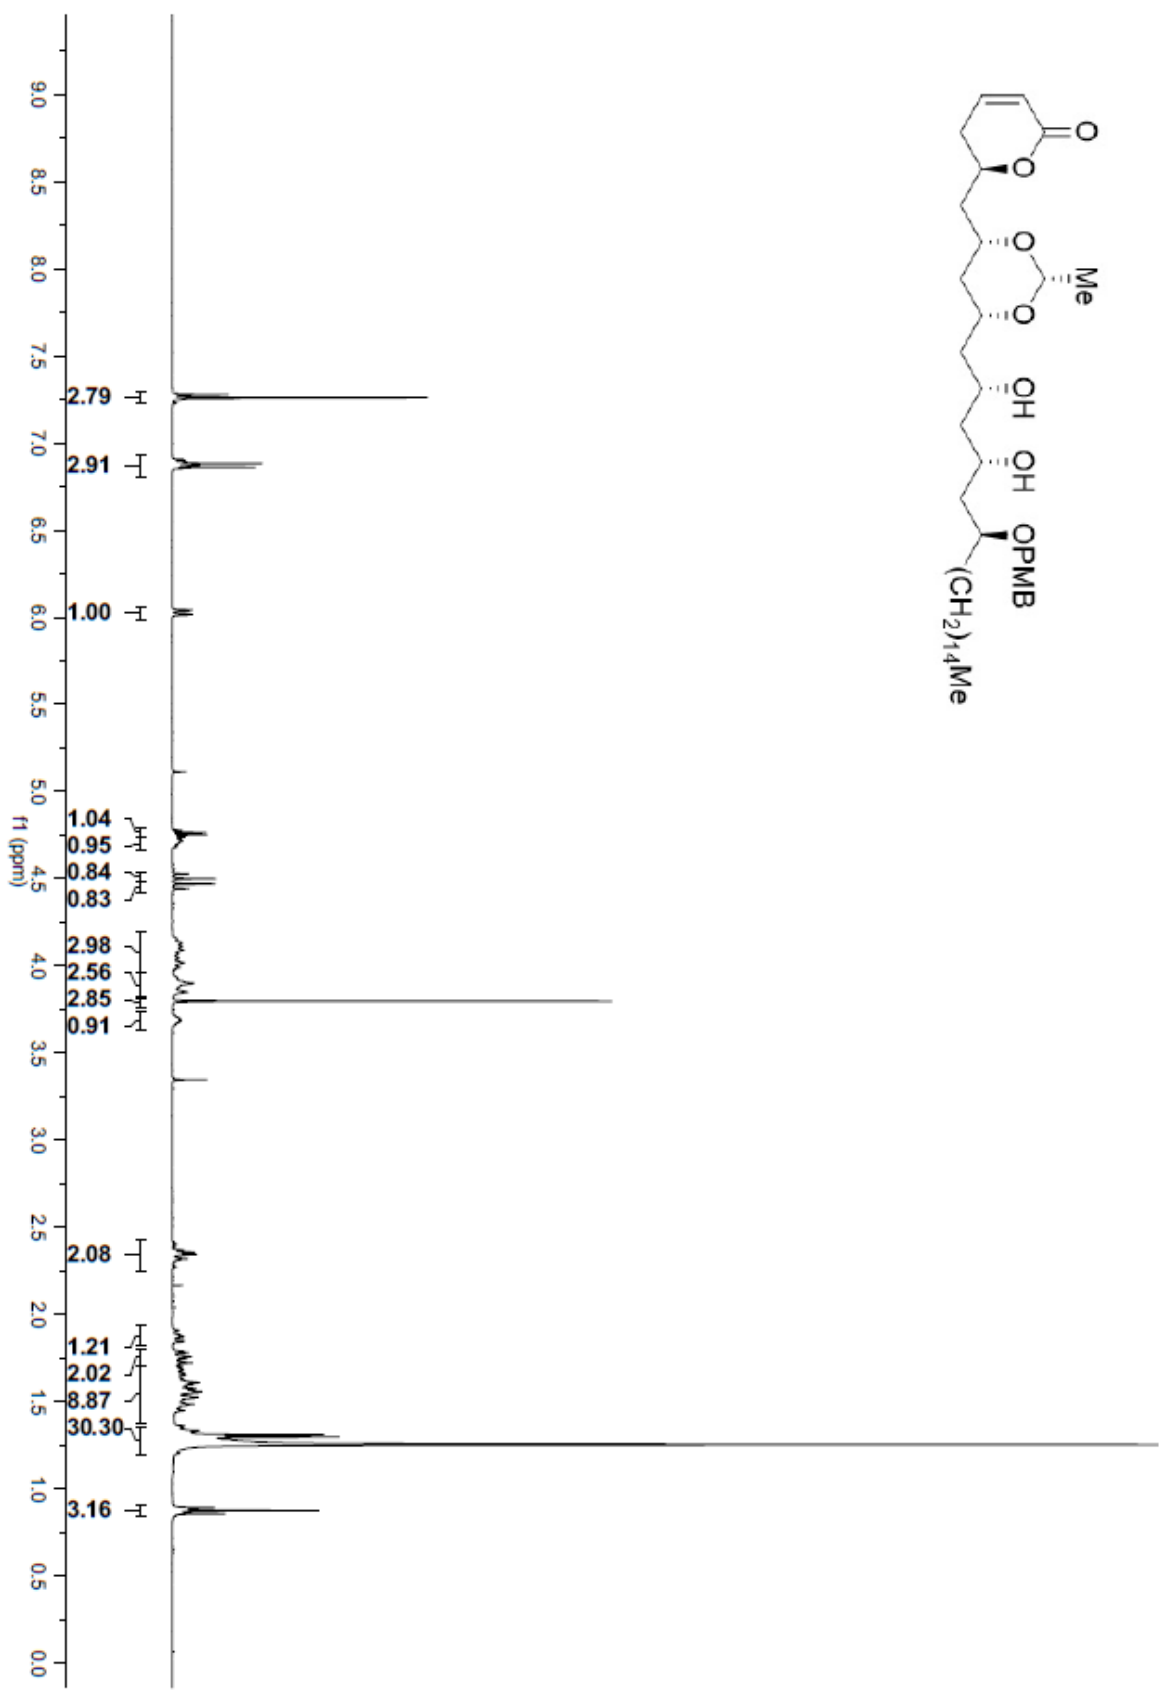

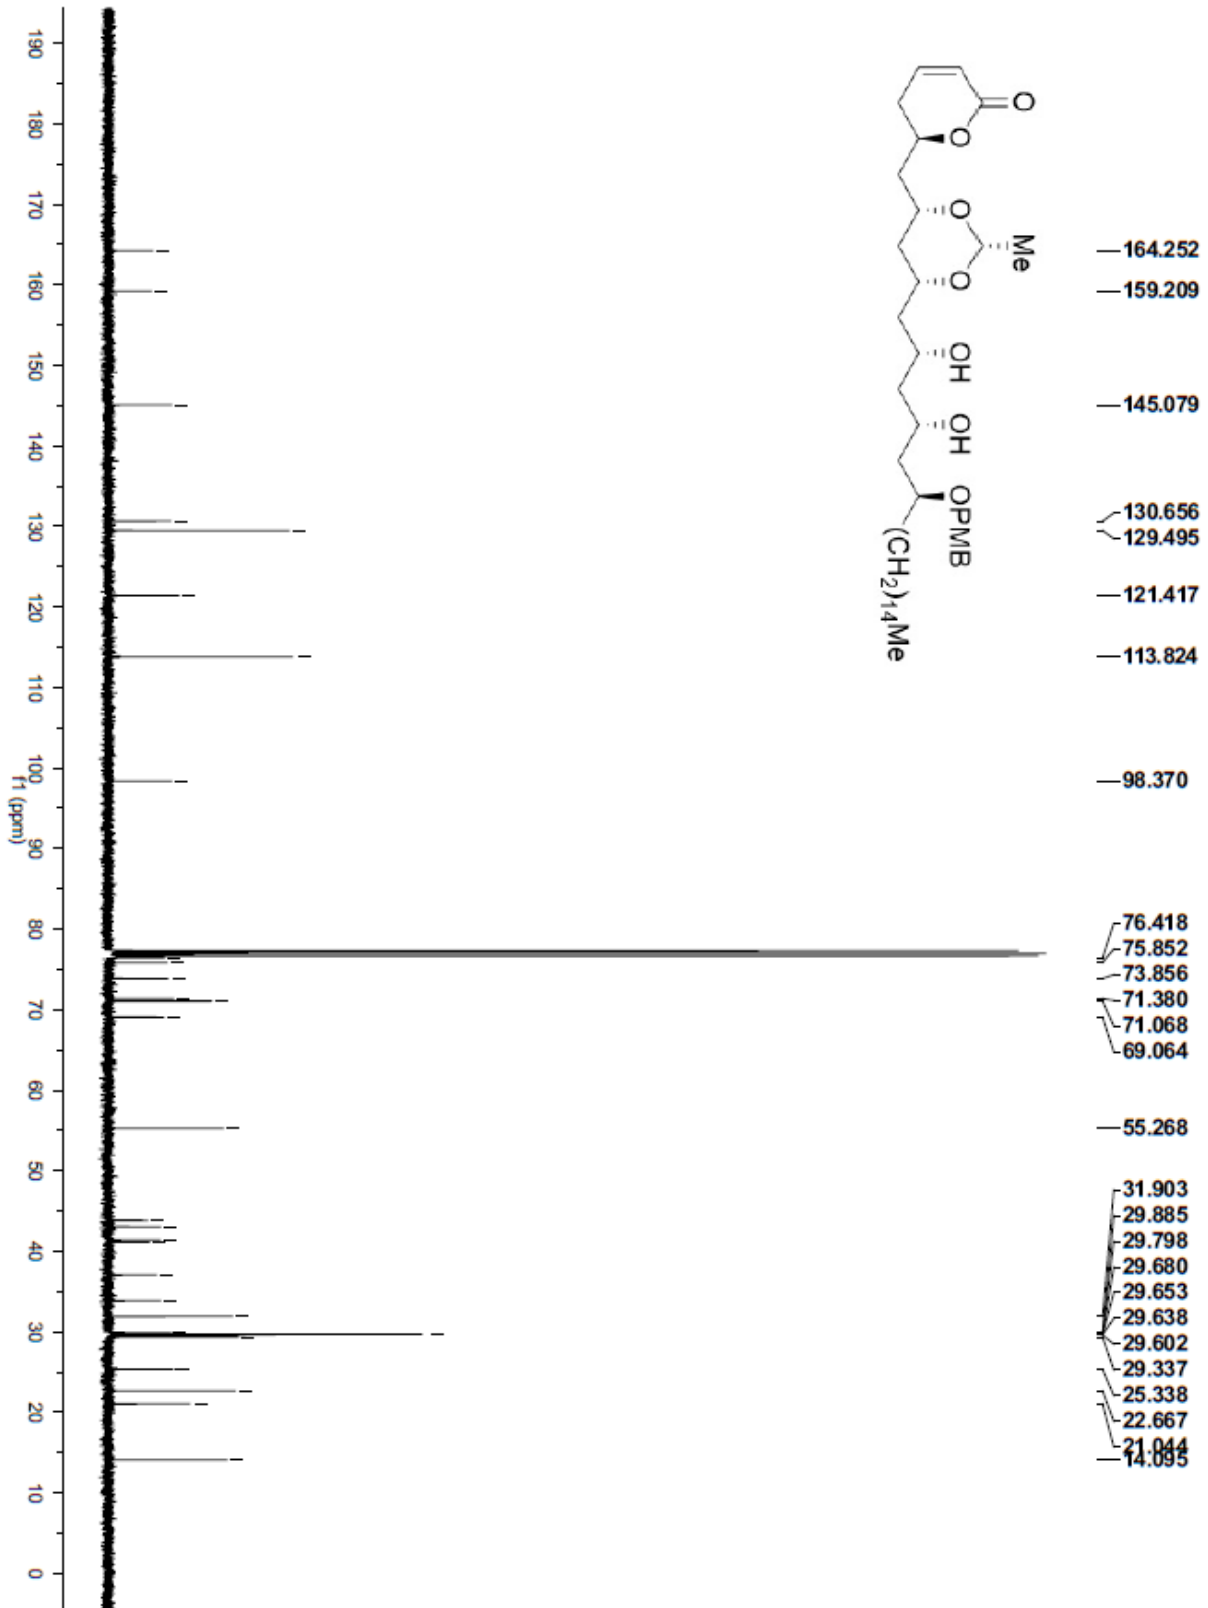

### (+)-Cryptocaryol A

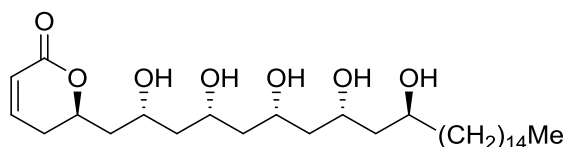

A 10 mL screw cap vial was charged with diol **8** (32.4 mg, 0.0480 mmol, 100 mol%), 1,3-dimethoxybenzene (59.7 mg, 0.200 mmol, 900 mol%) and dichloromethane (2.4 mL, 0.02 M). Triflic acid (21.6 mg, 0.144 mmol, 300 mol%) was added and a dark red solution developed immediately. The solution was stirred at ambient temperature for 30 min, at which point saturated NaHCO<sub>3</sub> (5 mL) was added with vigorous stirring. The cloudy mixture was extracted with chloroform (5 x 5 mL), dried (Na<sub>2</sub>SO<sub>4</sub>) and concentrated *in vacuo*. The white semi-solid was absorbed onto silica gel and subjected to flash column chromatography (SiO<sub>2</sub>, MeOH:CHCl<sub>3</sub> 1:99 to 1:19) to provide (+)-**cryptocaryol A** as a white solid (19.1 mg, 0.036 mmol) in 75% yield.

**TLC (SiO<sub>2</sub>):** 0.32 (1:9 MeOH:CHCl<sub>3</sub>)

**<sup>1</sup>H NMR:** (400 MHz, CD<sub>3</sub>OD):  $\delta$  = 7.05 (ddd,  $J$ =9.7, 5.9, 2.6, 1H), 5.98 (ddd,  $J$ =9.7, 2.6, 1.1, 1H), 4.82 – 4.61 (m, 1H), 4.22 – 3.92 (m, 4H), 3.90 – 3.69 (m, 1H), 2.46 (dddd,  $J$ =18.6, 5.8, 4.4, 1.1 Hz, 1H), 2.37 (ddt,  $J$ =18.7, 11.4, 2.6, 1H), 1.95 (ddd,  $J$ =14.5, 9.8, 2.6, 1H), 1.74 – 1.54 (m, 7H), 1.52 (dd,  $J$ =6.7, 5.5 Hz, 2H), 1.48 – 1.40 (m, 3H), 1.38 – 1.21 (m, 27H), 0.90 (t,  $J$ =6.9, 3H).

**<sup>13</sup>C NMR:** (126 MHz, CD<sub>3</sub>OD)  $\delta$  = 166.9, 148.5, 121.4, 76.6, 70.1, 69.9, 69.1, 68.2, 66.6, 46.0, 45.9, 45.7, 45.2, 43.9, 39.2, 33.1, 30.9, 30.84-30.76 (9C), 30.5, 26.8, 23.7, 14.4.

**FTIR (neat):** 3365, 2916, 2849, 1718, 1470, 1389, 1268, 1139 cm<sup>-1</sup>.

**HRMS:** (ESI) Calcd. for C<sub>30</sub>H<sub>56</sub>O<sub>7</sub> (M+Na)<sup>+</sup>: 551.39180, Found: 551.39200.

**[ $\alpha$ ]<sup>22</sup><sub>D</sub>:** +27.45 ° (c = 0.51, MeOH).

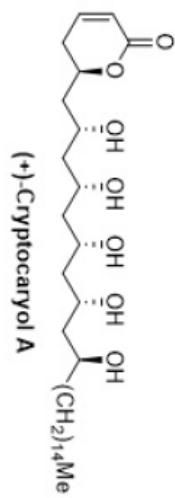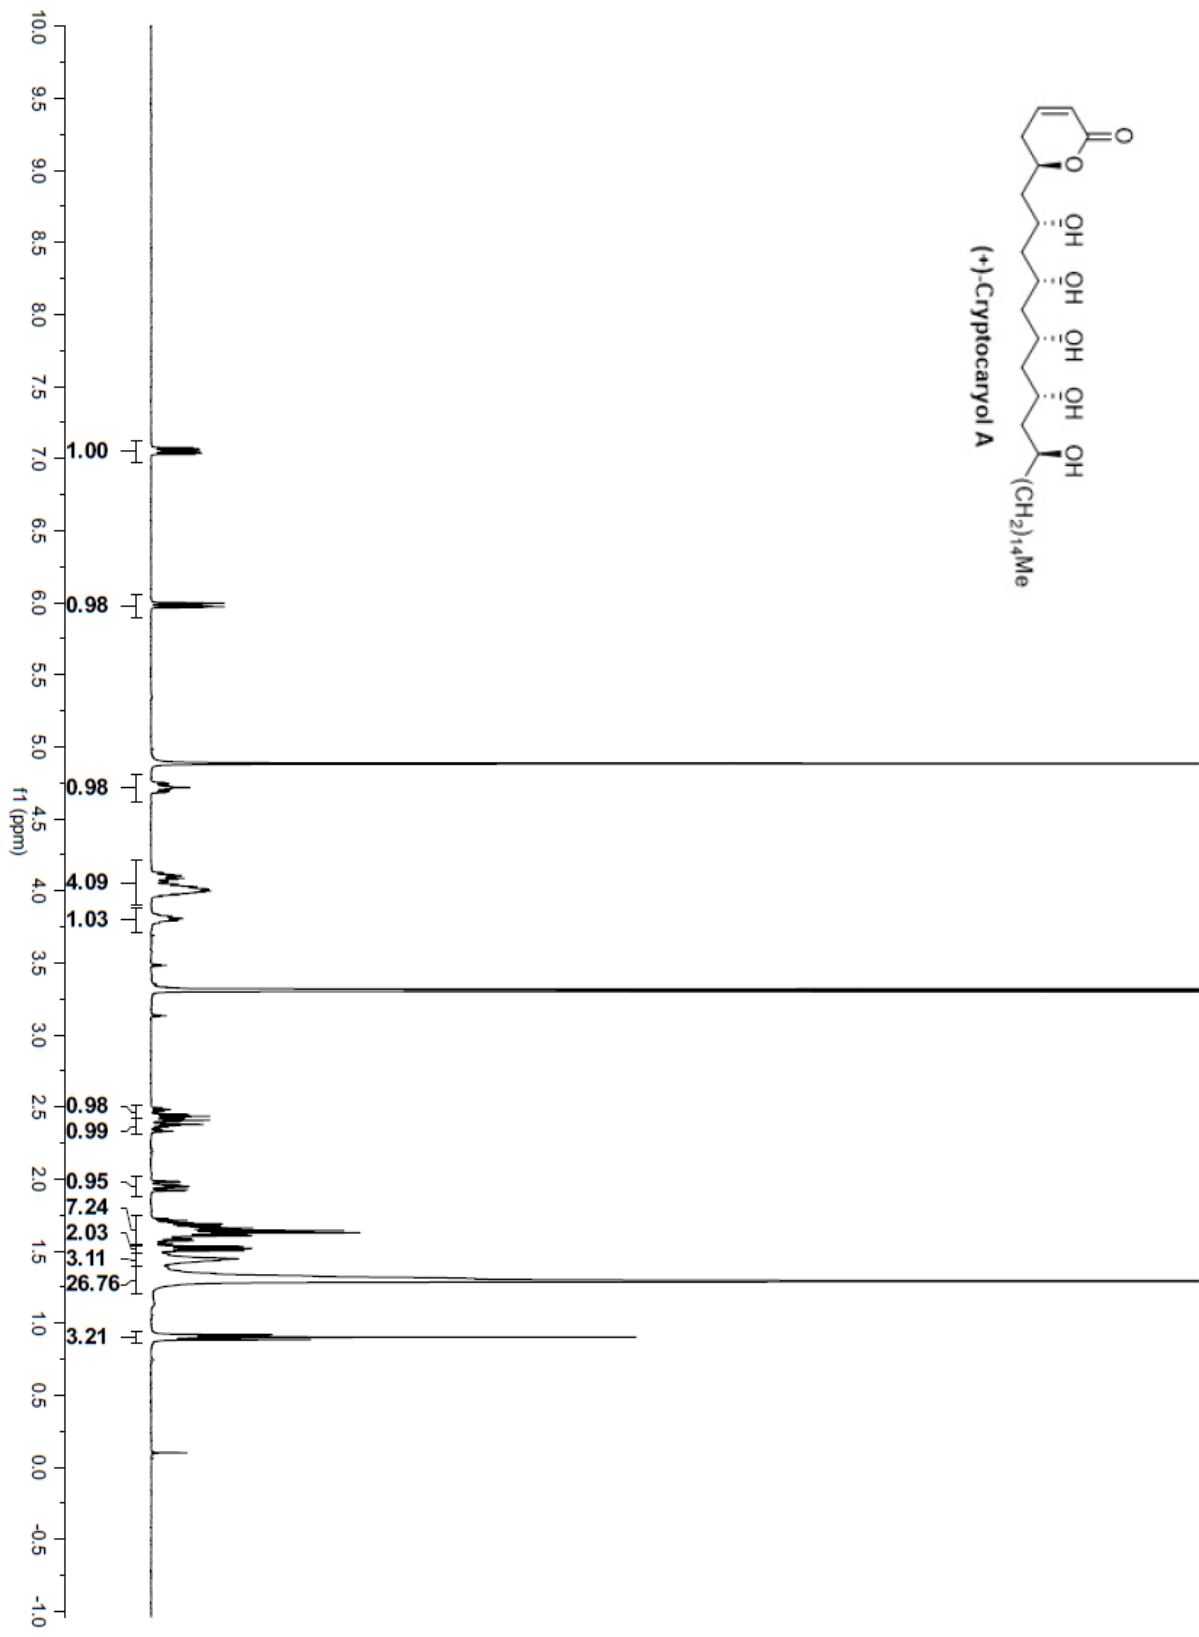

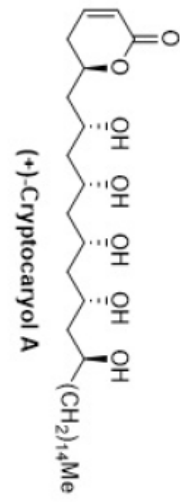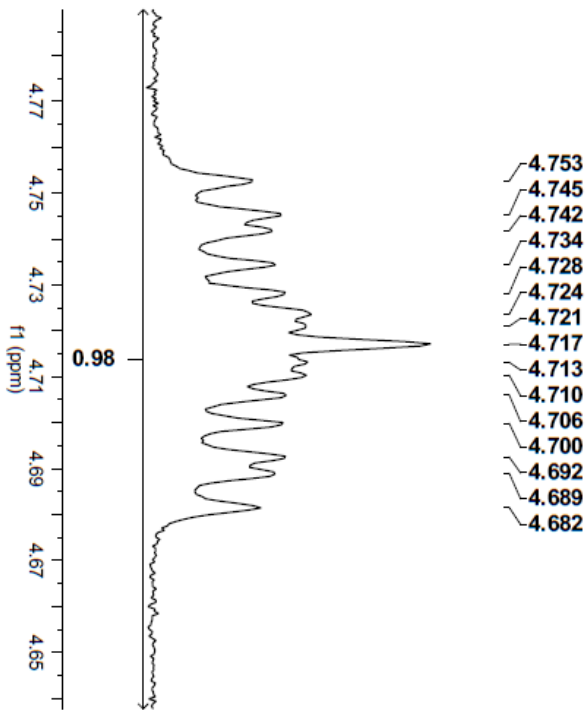

- 4.753
- 4.745
- 4.742
- 4.734
- 4.728
- 4.724
- 4.721
- 4.717
- 4.713
- 4.710
- 4.706
- 4.700
- 4.692
- 4.689
- 4.682

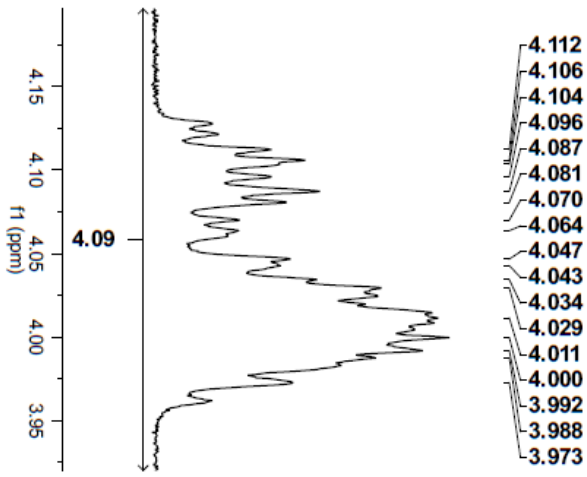

- 4.112
- 4.106
- 4.104
- 4.096
- 4.087
- 4.081
- 4.070
- 4.064
- 4.047
- 4.043
- 4.034
- 4.029
- 4.011
- 4.000
- 3.992
- 3.988
- 3.973

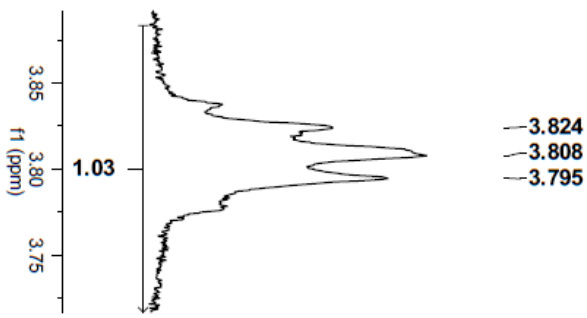

- 3.824
- 3.808
- 3.795

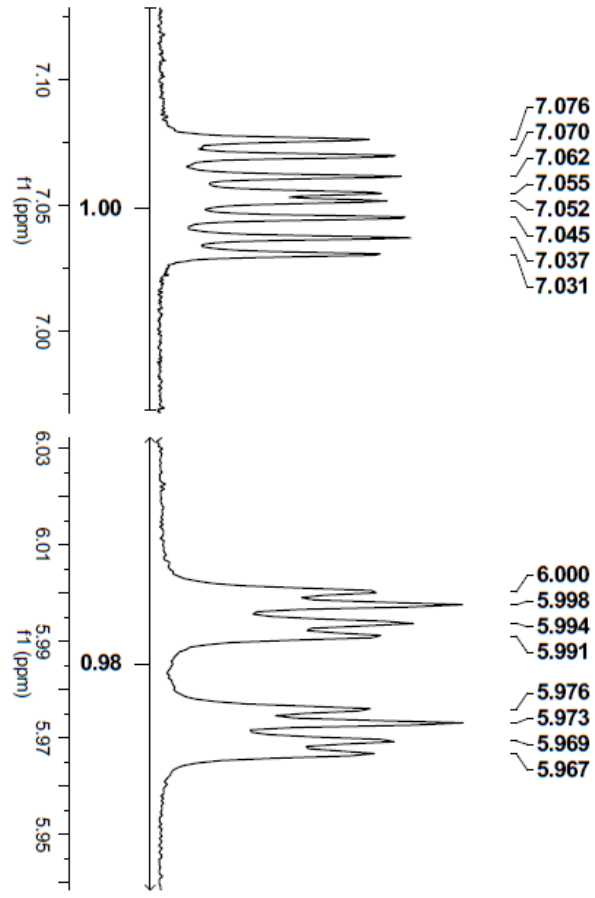

- 7.076
- 7.070
- 7.062
- 7.055
- 7.052
- 7.045
- 7.037
- 7.031

- 6.000
- 5.998
- 5.994
- 5.991
- 5.976
- 5.973
- 5.969
- 5.967



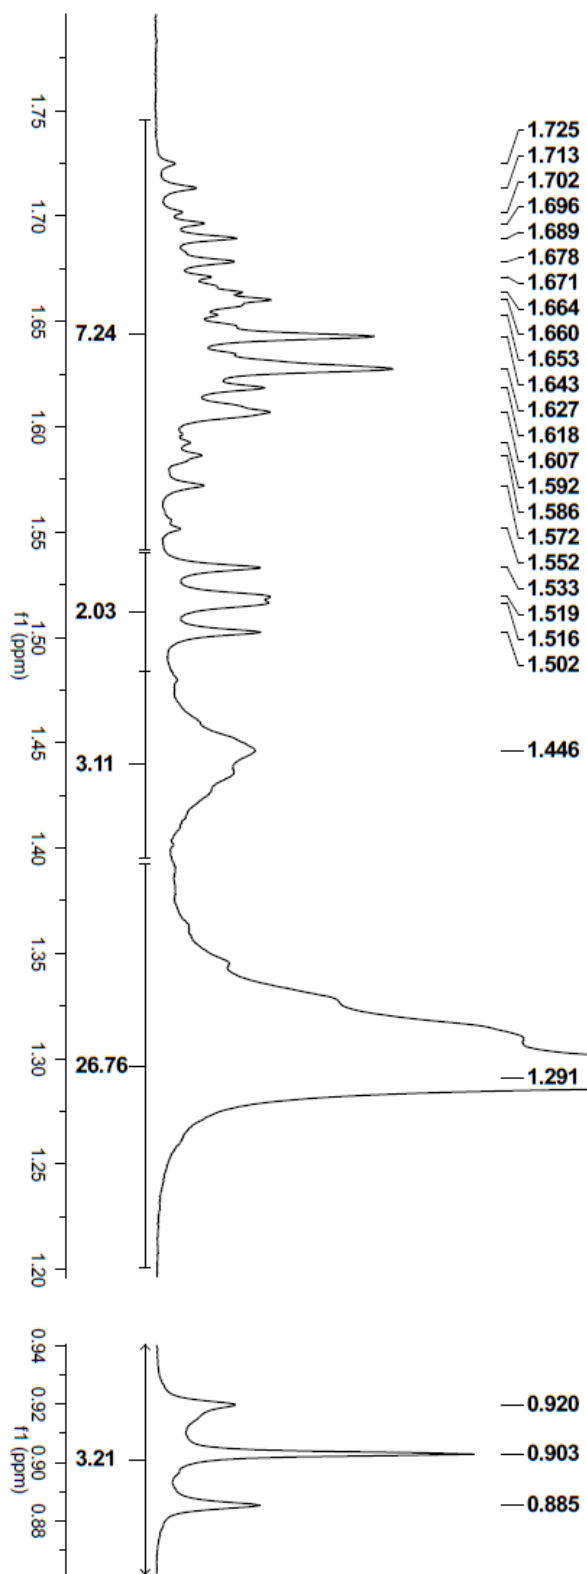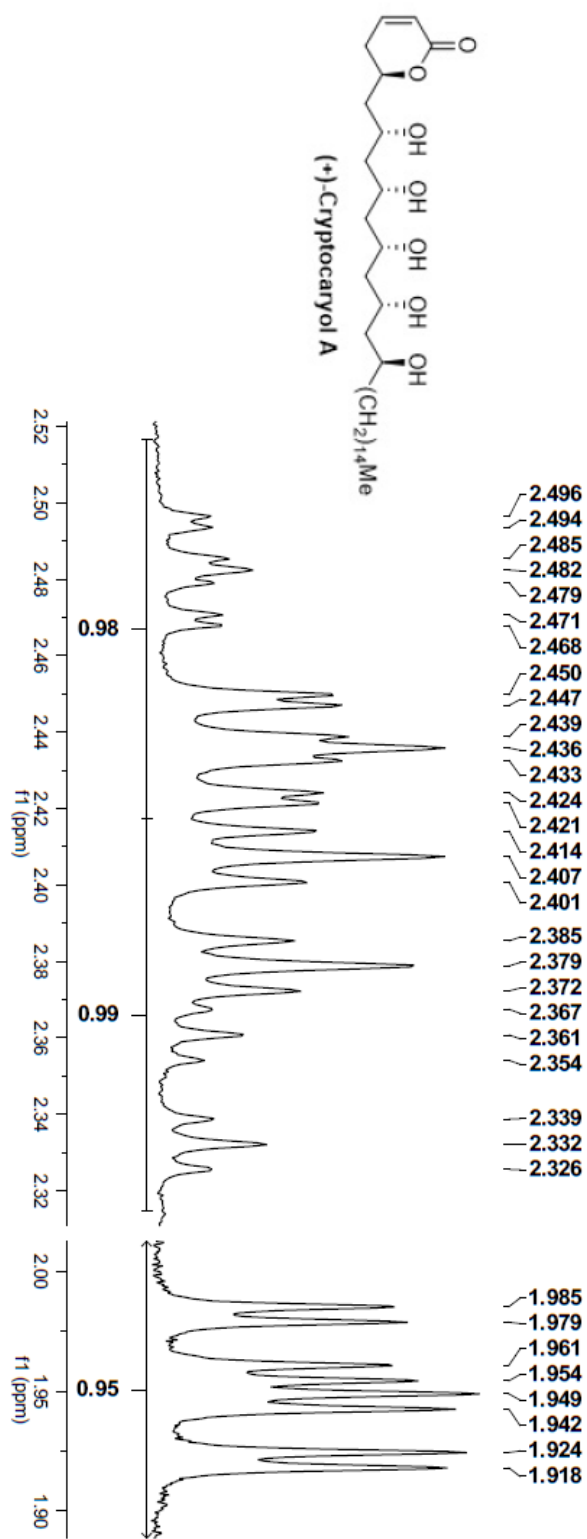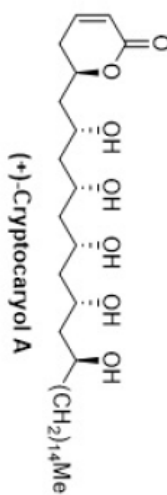

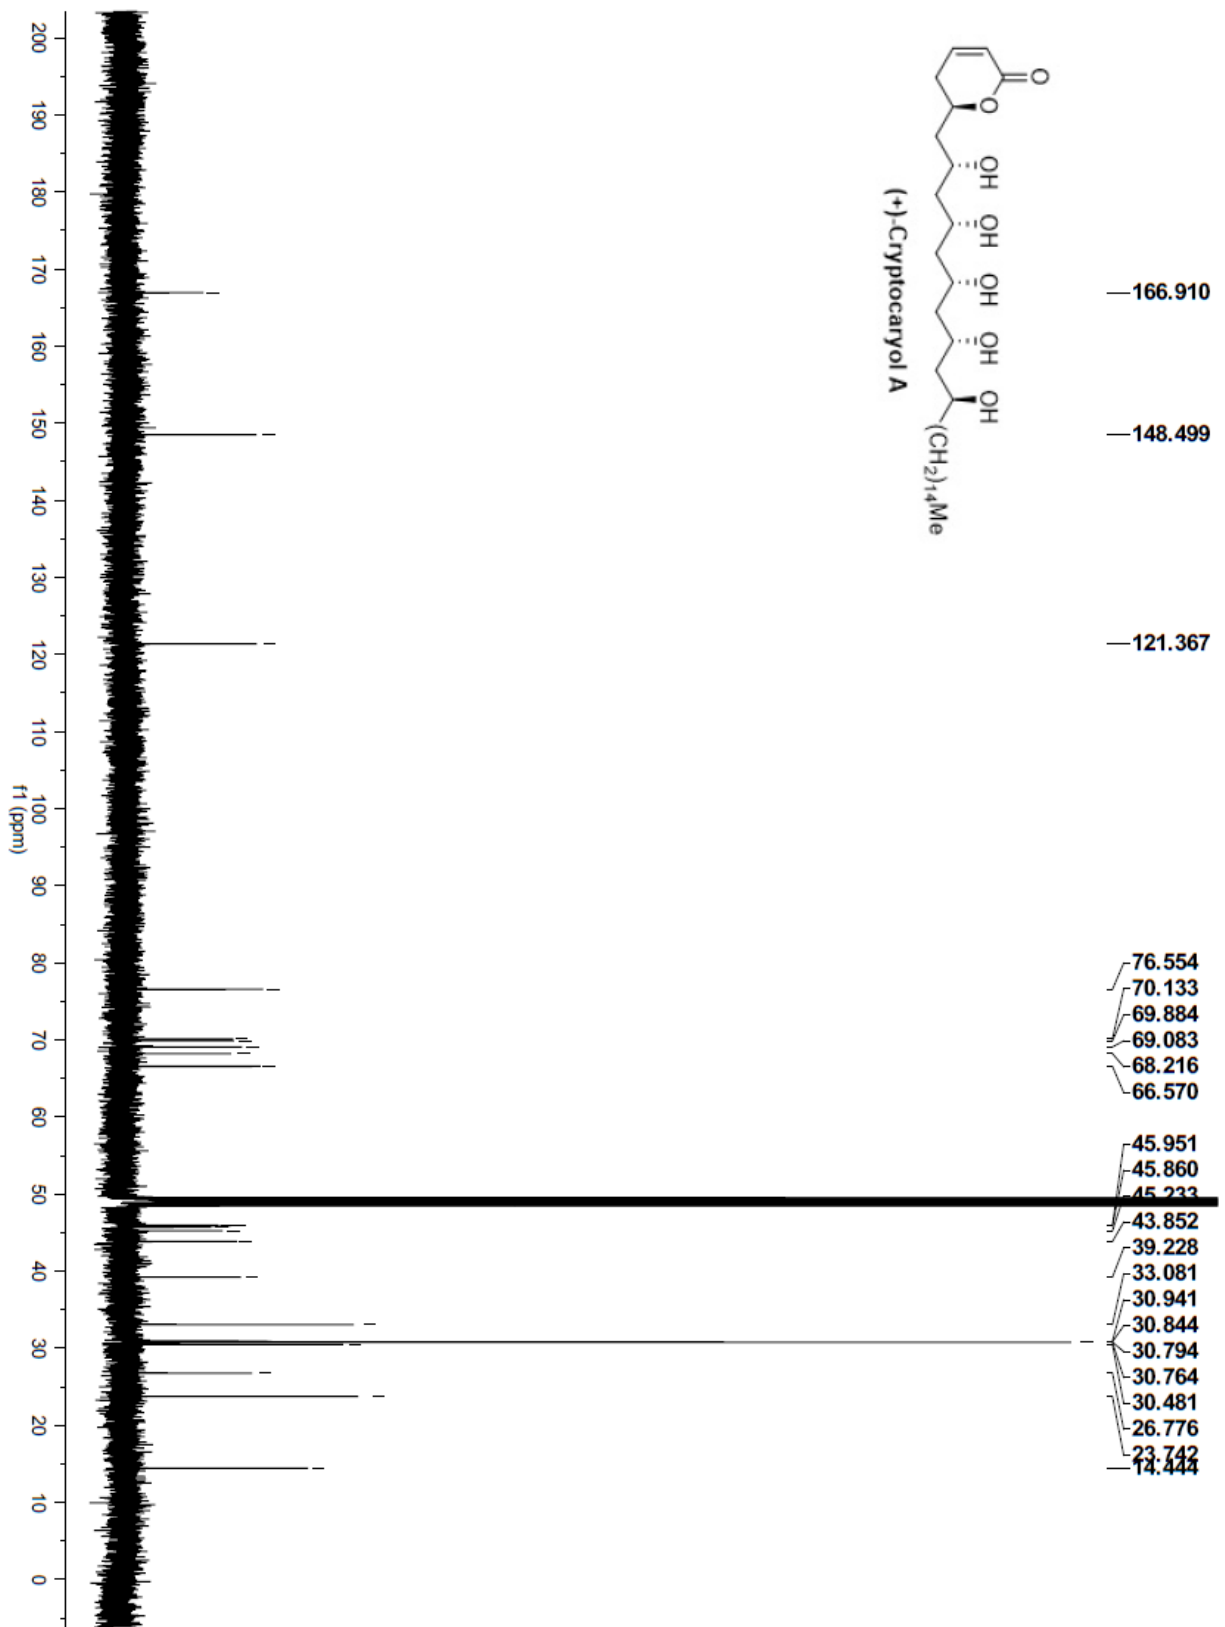

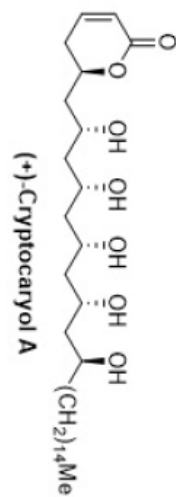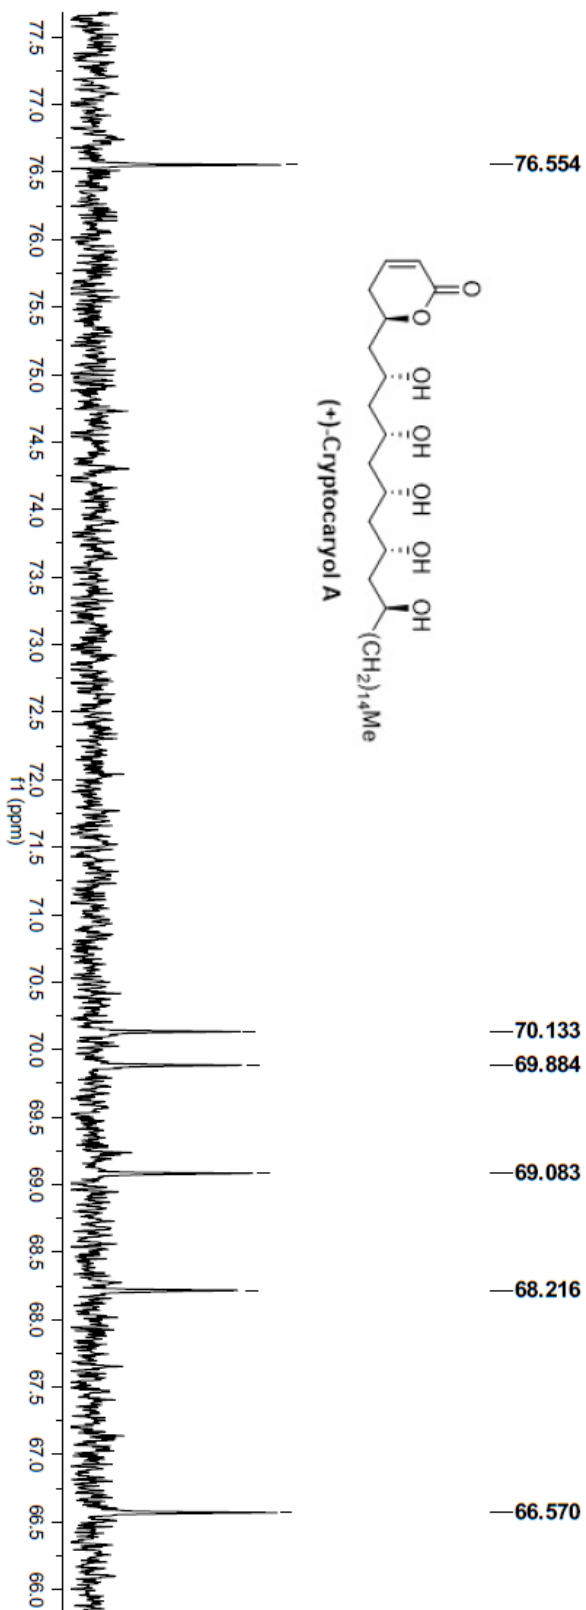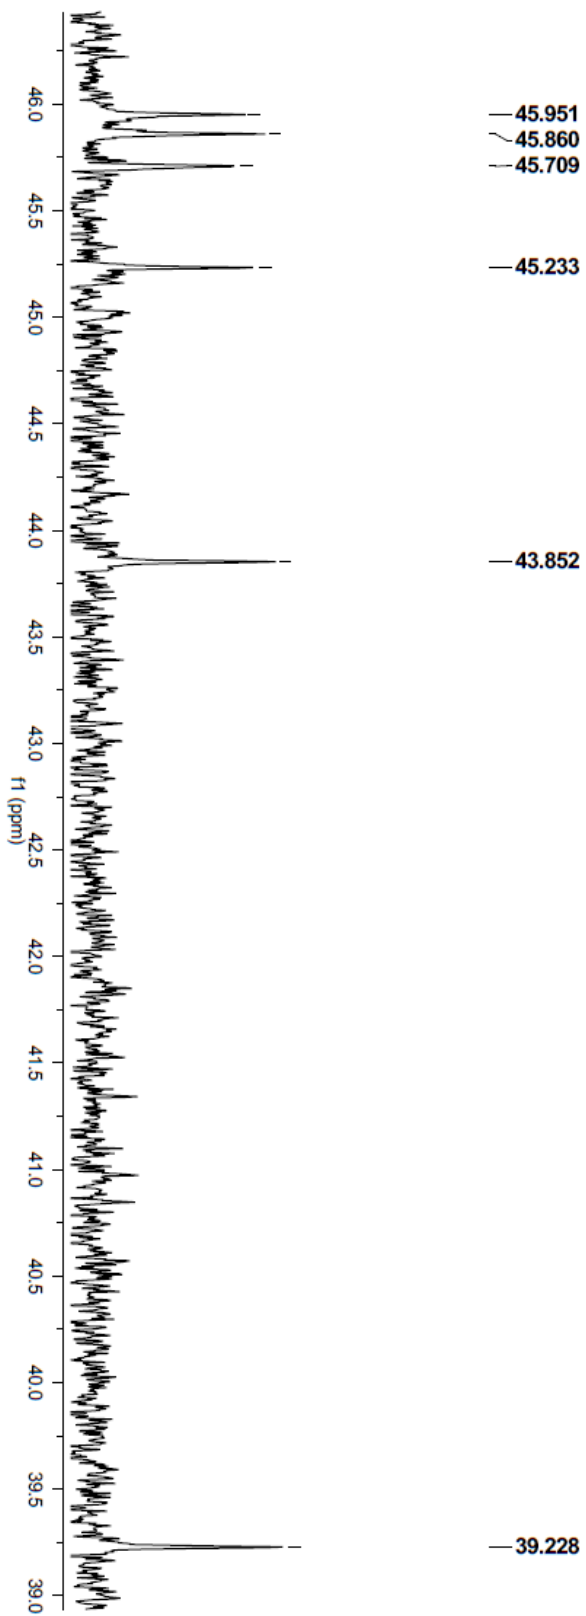

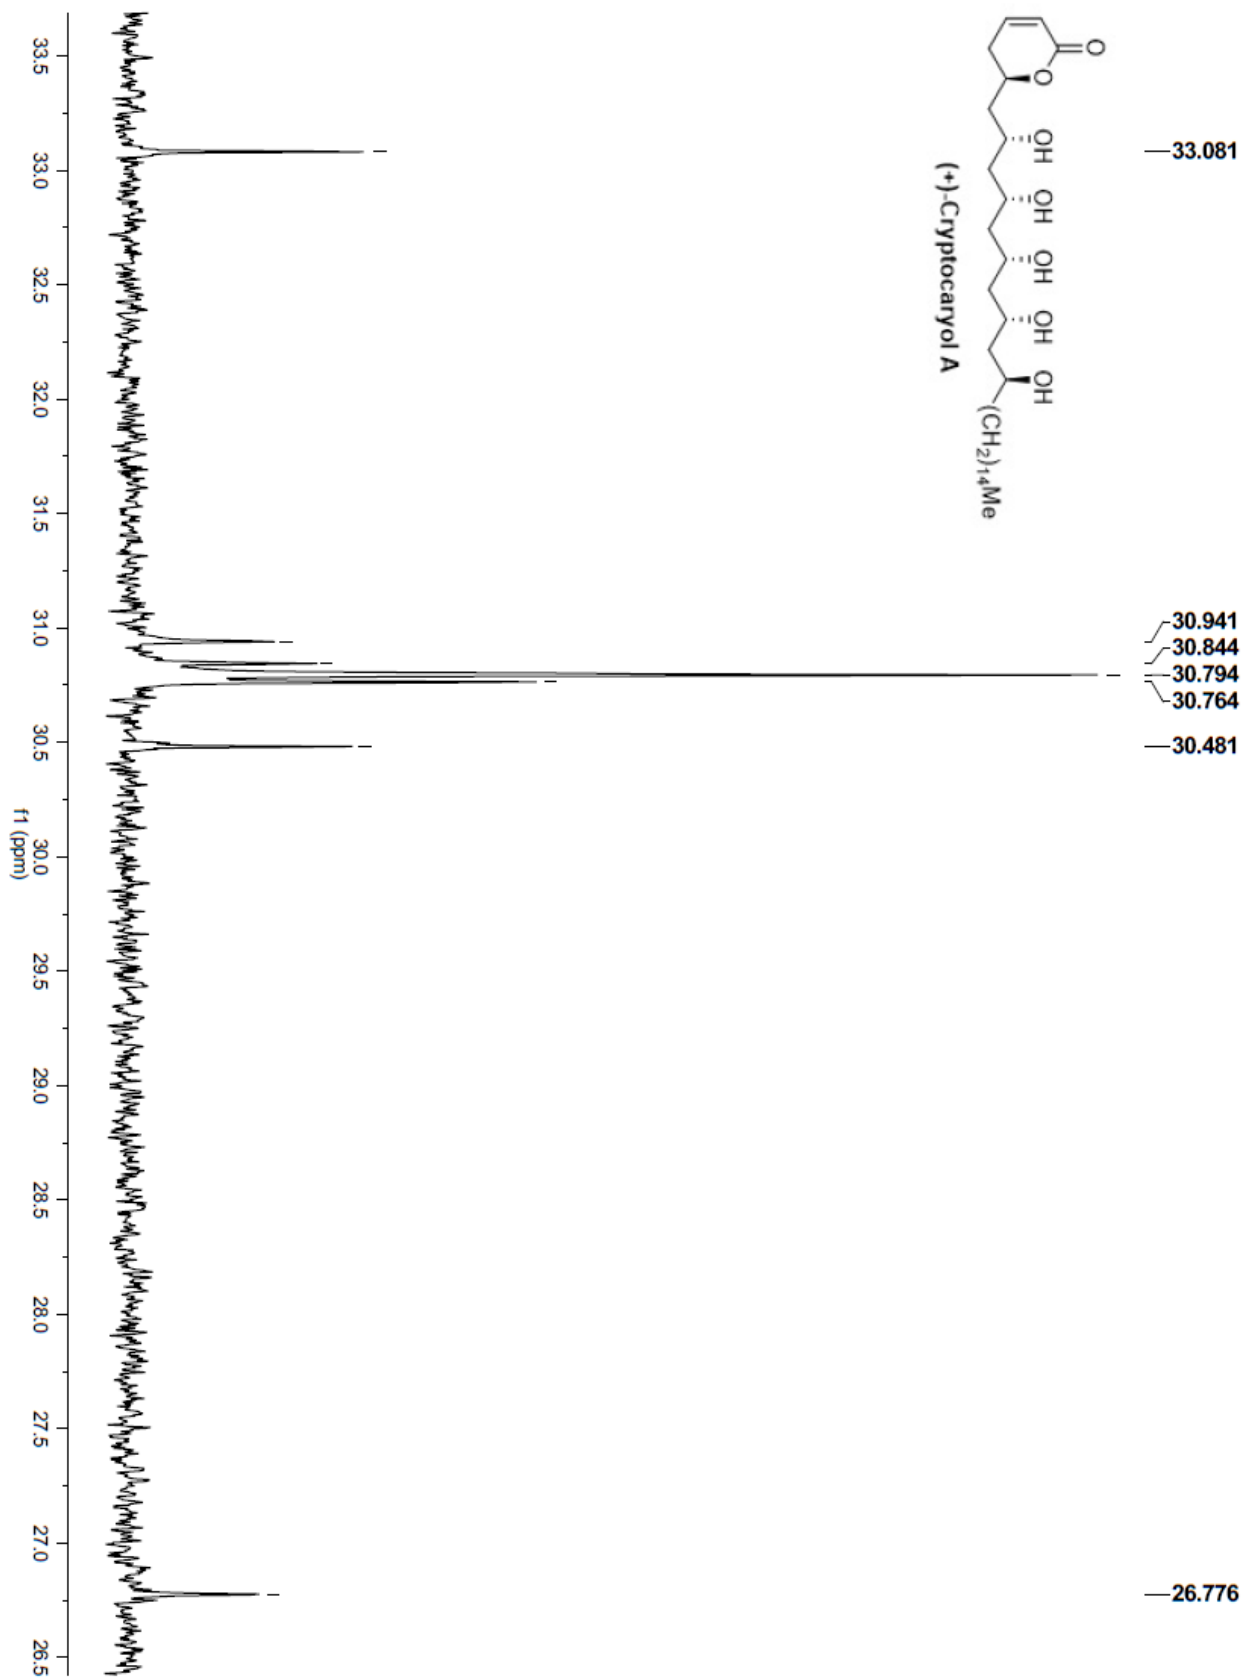

Supplement: NIHMS763365-supplement-Supporting_Information.pdf [file NIHMS763365-supplement-Supporting_Information.pdf]
